# Supplementary material
Source: PubMed Central journal article supplement (PMC8865842)
Supplement: NIHMS1777841-supplement-Supplementary_Material.pdf [file NIHMS1777841-supplement-Supplementary_Material.pdf]

# Improving Structure-Based Virtual Screening with Ensemble Docking and Machine Learning: Supporting Information

Joel Ricci-López,<sup>†</sup> Sergio A. Aguila,<sup>\*,‡</sup> Michael K. Gilson,<sup>¶</sup> and Carlos A.  
Brizuela<sup>\*,†</sup>

<sup>†</sup>*Centro de Investigación Científica y de Educación Superior de Ensenada (CICESE),  
Ensenada, Baja California, México, C.P. 22860*

<sup>‡</sup>*Centro de Nanociencias y Nanotecnología, Universidad Nacional Autónoma de México  
(UNAM), Ensenada, Baja California, México, C.P. 22860*

<sup>¶</sup>*Skaggs School of Pharmacy and Pharmaceutical Sciences, University of California, San  
Diego, La Jolla, California 92093, USA.*

E-mail: aguila@cryn.unam.mx; cbrizuel@cicese.mx

Table S1: Hyperparameter optimization of the two Machine Learning models.

| ML model                       | Hyperparameter   | Grid Values              | Default Values | Chosen values |      |      |       |
|--------------------------------|------------------|--------------------------|----------------|---------------|------|------|-------|
|                                |                  |                          |                | CDK2          | FXa  | EGFR | HSP90 |
| <b>Logistic Regression</b>     | C                | 1e-6, 1e-4, 0.01, 1, 100 | 0.01           | 1.0           | 0.01 | 1.0  | 1.0   |
|                                | penalty          | $l1, l2$                 | $l2$           | $l2$          | $l2$ | $l2$ | $l2$  |
| <b>Gradient Boosting Trees</b> | n_estimators     | 200, 300, 500            | 100            | 200           | 200  | 200  | 500   |
|                                | max_depth        | 3, 5, 10, 20             | <i>None</i>    | 20            | 10   | 10   | 5     |
|                                | learning_rate    | 0.05, 0.1                | <i>None</i>    | 0.05          | 0.1  | 0.1  | 0.05  |
|                                | gamma            | 0.01, 0.1, 0.5, 1        | <i>None</i>    | 0.01          | 1    | 0.01 | 0.01  |
|                                | alpha            | 0.01, 0.1, 0.5, 1        | <i>None</i>    | 0.01          | 0.5  | 0.01 | 0.1   |
|                                | subsample        | 0.3, 0.5, 1              | <i>None</i>    | 0.5           | 0.5  | 0.5  | 0.6   |
|                                | colsample_bytree | 0.3, 0.5, 1              | <i>None</i>    | 0.5           | 1    | 0.5  | 0.5   |

<sup>a</sup> The meaning and the default values of the ML classifiers' hyperparameters can be consulted in the scikit-learn<sup>1</sup> documentation (v0.23.2), and the XGBoost<sup>2</sup> documentation (v1.3.0).

Table S2: Shapiro-Wilk (SW) normality test<sup>3</sup> results per virtual screening method from the 30x4cv analysis.

| Protein | Metric  | SW results  | csAVG       | csGEO       | csMIN       | DClf        | GBT         | LR          |
|---------|---------|-------------|-------------|-------------|-------------|-------------|-------------|-------------|
| CDK2    | AUC-ROC | W-statistic | 0.99        | 0.99        | 0.99        | 0.99        | 0.97        | 0.99        |
|         |         | p-value     | 0.37        | 0.34        | 0.36        | 0.27        | <b>0.01</b> | 0.40        |
|         | NEF     | W-statistic | 0.98        | 0.99        | 0.98        | 0.98        | 0.98        | 0.99        |
|         |         | p-value     | 0.21        | 0.38        | 0.14        | <b>0.05</b> | 0.13        | 0.47        |
| FXa     | AUC-ROC | W-statistic | 0.98        | 0.98        | 0.98        | 0.98        | 0.98        | 0.99        |
|         |         | p-value     | 0.10        | 0.10        | <b>0.08</b> | <b>0.03</b> | 0.18        | 0.50        |
|         | NEF     | W-statistic | 0.97        | 0.98        | 0.98        | 0.94        | 0.98        | 0.98        |
|         |         | p-value     | <b>0.03</b> | <b>0.04</b> | 0.06        | <b>0.00</b> | <b>0.05</b> | <b>0.04</b> |
| EGFR    | AUC-ROC | W-statistic | 0.99        | 0.99        | 0.99        | 0.98        | 0.98        | 0.99        |
|         |         | p-value     | 0.73        | 0.71        | 0.36        | 0.18        | 0.20        | 0.48        |
|         | NEF     | W-statistic | 0.98        | 0.98        | 0.99        | 0.97        | 0.98        | 0.99        |
|         |         | p-value     | 0.13        | 0.10        | 0.31        | <b>0.02</b> | 0.14        | 0.59        |
| HSP90   | AUC-ROC | W-statistic | 0.99        | 0.99        | 0.99        | 0.98        | 0.98        | 0.99        |
|         |         | p-value     | 0.35        | 0.55        | 0.69        | 0.17        | 0.12        | 0.24        |
|         | NEF     | W-statistic | 0.98        | 0.97        | 0.98        | 0.98        | 0.99        | 0.98        |
|         |         | p-value     | 0.07        | <b>0.02</b> | 0.21        | <b>0.05</b> | 0.54        | 0.17        |

*LR*: Logistic Regression; *GBT*: Gradient Boosting Trees; *DClf*: Dummy Classifier; *csAVG*: average; *csGEO*: geometric mean; *csMIN*: minimum.

**Bold-font values**: Null hypothesis of normality rejected, at  $\alpha = 0.05$ .

Table S3: Repeated measures ANOVA and Mauchly's tests<sup>4</sup> of sphericity results.

| <b>Protein</b> | <b>Metric</b> | <b>DFn</b> | <b>DFd</b> | <b>F</b> | <b>p</b> | <b>p&lt;.05</b> | <b>ges</b> | <b>W-sphe</b> | <b>p-sphe</b> | <b>p&lt;.05</b> |
|----------------|---------------|------------|------------|----------|----------|-----------------|------------|---------------|---------------|-----------------|
| <b>CDK2</b>    | AUC-ROC       | 5.00       | 595.00     | 8203.69  | 0.00     | *               | 0.98       | 0.00          | 0.00          | *               |
|                | NEF           | 5.00       | 595.00     | 5583.09  | 0.00     | *               | 0.96       | 0.03          | 0.00          | *               |
| <b>FXa</b>     | AUC-ROC       | 5.00       | 595.00     | 6864.65  | 0.00     | *               | 0.96       | 0.00          | 0.00          | *               |
|                | NEF           | 5.00       | 595.00     | 3428.12  | 0.00     | *               | 0.94       | 0.03          | 0.00          | *               |
| <b>EGFR</b>    | AUC-ROC       | 5.00       | 595.00     | 26063.04 | 0.00     | *               | 0.99       | 0.00          | 0.00          | *               |
|                | NEF           | 5.00       | 595.00     | 17595.87 | 0.00     | *               | 0.99       | 0.01          | 0.00          | *               |
| <b>HSP90</b>   | AUC-ROC       | 5.00       | 595.00     | 4348.47  | 0.00     | *               | 0.95       | 0.00          | 0.00          | *               |
|                | NEF           | 5.00       | 595.00     | 3280.88  | 0.00     | *               | 0.94       | 0.16          | 0.00          | *               |

**DFn, DFd:** Degrees of freedom, n: numerator, d: denominator.

**F:** F-value. **p:** Repeated measures ANOVA p-value.

**ges:** Generalized effect size.

**W-sphe:** Mauchly's statistic. **p-sphe:** Sphericity p-value.

**(a)**

**CDK2 molecular library. Initial and final number of molecules per benchmarking set.**

| Libraries    | Initial num. of molecules | Final num. of molecules |
|--------------|---------------------------|-------------------------|
| COCRY5       | 315                       | 292                     |
| CSAR         | 111                       | 110                     |
| DEKOIS       | 2,146                     | 1,825                   |
| DUD          | 1,240                     | 1,239                   |
| <b>Total</b> | <b>3,812</b>              | <b>3,466</b>            |

**CDK2: duplicated molecules among benchmarking sets**

| Library 1 | Library 2 | Num. of duplicated mols |
|-----------|-----------|-------------------------|
| COCRY5    | COCRY5    | 2                       |
| COCRY5    | CSAR      | 8                       |
| COCRY5    | DEKOIS    | 1                       |
| COCRY5    | DUD       | 17                      |
| CSAR      | DUD       | 1                       |
| DEKOIS    | DEKOIS    | 3                       |
| DUD       | DEKOIS    | 3                       |
| DUD       | DUD       | 503                     |

**CDK2: Merged library**

| Total num. of molecules | Num. of actives | Num. of decoys | Ra value |
|-------------------------|-----------------|----------------|----------|
| 3,466                   | 415             | 3,051          | 0.119    |

**(b)**

**FXa molecular library. Initial and final number of molecules per benchmarking set.**

| Libraries    | Initial num. of molecules | Final num. of molecules |
|--------------|---------------------------|-------------------------|
| COCRY5       | 128                       | 119                     |
| DEKOIS       | 1,240                     | 1,221                   |
| DUD          | 5,891                     | 4,893                   |
| <b>Total</b> | <b>7,259</b>              | <b>6,233</b>            |

**FXa: duplicated molecules among benchmarking sets**

| Library 1 | Library 2 | Num. of duplicated mols |
|-----------|-----------|-------------------------|
| COCRY5    | COCRY5    | 3                       |
| COCRY5    | DEKOIS    | 1                       |
| COCRY5    | DUD       | 5                       |
| DEKOIS    | DEKOIS    | 21                      |
| DUD       | DEKOIS    | 2                       |
| DUD       | DUD       | 2,001                   |

**FXa: Merged library**

| Total num. of molecules | Num. of actives | Num. of decoys | Ra value |
|-------------------------|-----------------|----------------|----------|
| 6,233                   | 300             | 5,933          | 0.048    |

Figure S1: **Molecular libraries.** Tables showing the initial and the final number of molecules inside each molecular library after eliminating duplicates. The number of duplicates among pairs of molecular libraries is also shown. (a) CDK2 protein. (b) FXa protein.

**(c)**

**EGFR molecular library. Initial and final number of molecules per benchmarking set.**

| Libraries    | Initial num. of molecules | Final num. of molecules |
|--------------|---------------------------|-------------------------|
| COCRYS       | 109                       | 105                     |
| DEKOIS       | 1,240                     | 1,229                   |
| DUD          | 16,471                    | 14,176                  |
| <b>Total</b> | <b>17,820</b>             | <b>15,510</b>           |

**EGFR: duplicated molecules among benchmarking sets**

| Library 1 | Library 2 | Num. of duplicated mols |
|-----------|-----------|-------------------------|
| COCRYS    | COCRYS    | 4                       |
| COCRYS    | DEKOIS    | 0                       |
| COCRYS    | DUD       | 0                       |
| DEKOIS    | DEKOIS    | 41                      |
| DUD       | DEKOIS    | 5                       |
| DUD       | DUD       | 3,170                   |

**EGFR: Merged library**

| Total num. of molecules | Num. of actives | Num. of decoys | Ra value |
|-------------------------|-----------------|----------------|----------|
| 15,510                  | 585             | 14,925         | 0.037    |

**(d)**

**HSP90 molecular library. Initial and final number of molecules per benchmarking set.**

| Libraries    | Initial num. of molecules | Final num. of molecules |
|--------------|---------------------------|-------------------------|
| COCRYS       | 200                       | 191                     |
| DEKOIS       | 1,240                     | 1,234                   |
| DUD          | 1,016                     | 877                     |
| <b>Total</b> | <b>2,456</b>              | <b>2,302</b>            |

**HSP90: duplicated molecules among benchmarking sets**

| Library 1 | Library 2 | Num. of duplicated mols |
|-----------|-----------|-------------------------|
| COCRYS    | COCRYS    | 0                       |
| COCRYS    | DEKOIS    | 3                       |
| COCRYS    | DUD       | 6                       |
| DEKOIS    | DEKOIS    | 3                       |
| DUD       | DEKOIS    | 6                       |
| DUD       | DUD       | 214                     |

**HSP90: Merged library**

| Total num. of molecules | Num. of actives | Num. of decoys | Ra value |
|-------------------------|-----------------|----------------|----------|
| 2,302                   | 256             | 2,046          | 0.111    |

Figure S1: (Continuation) Molecular libraries. Tables showing the initial and the final number of molecules inside each molecular library after eliminating duplicates. The number of duplicates among pairs of molecular libraries is also shown. (c) EGFR protein. (d) HSP90 protein.

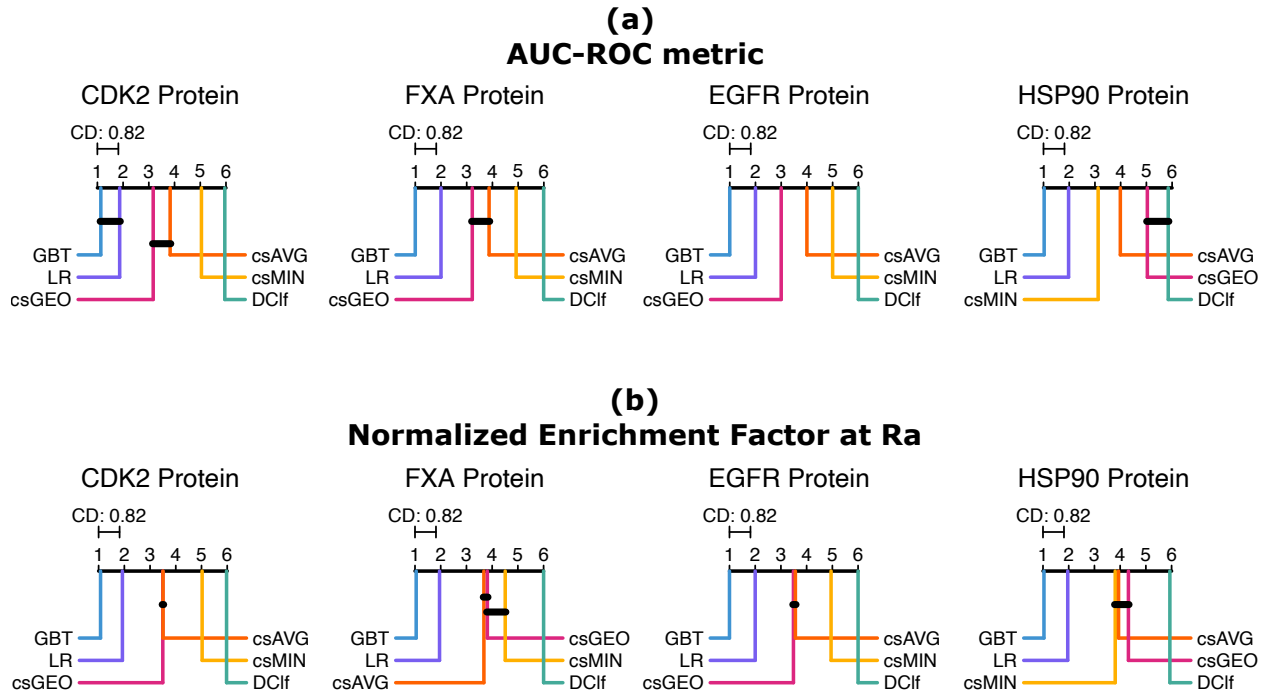

Figure S2: Critical Difference (CD) plots of the pairwise Nemenyi comparison test for the  $30 \times 4cv$  analysis. SBVS methods with average ranks within the CD (0.82) are not significantly different (at  $\alpha = 0.01$ ).

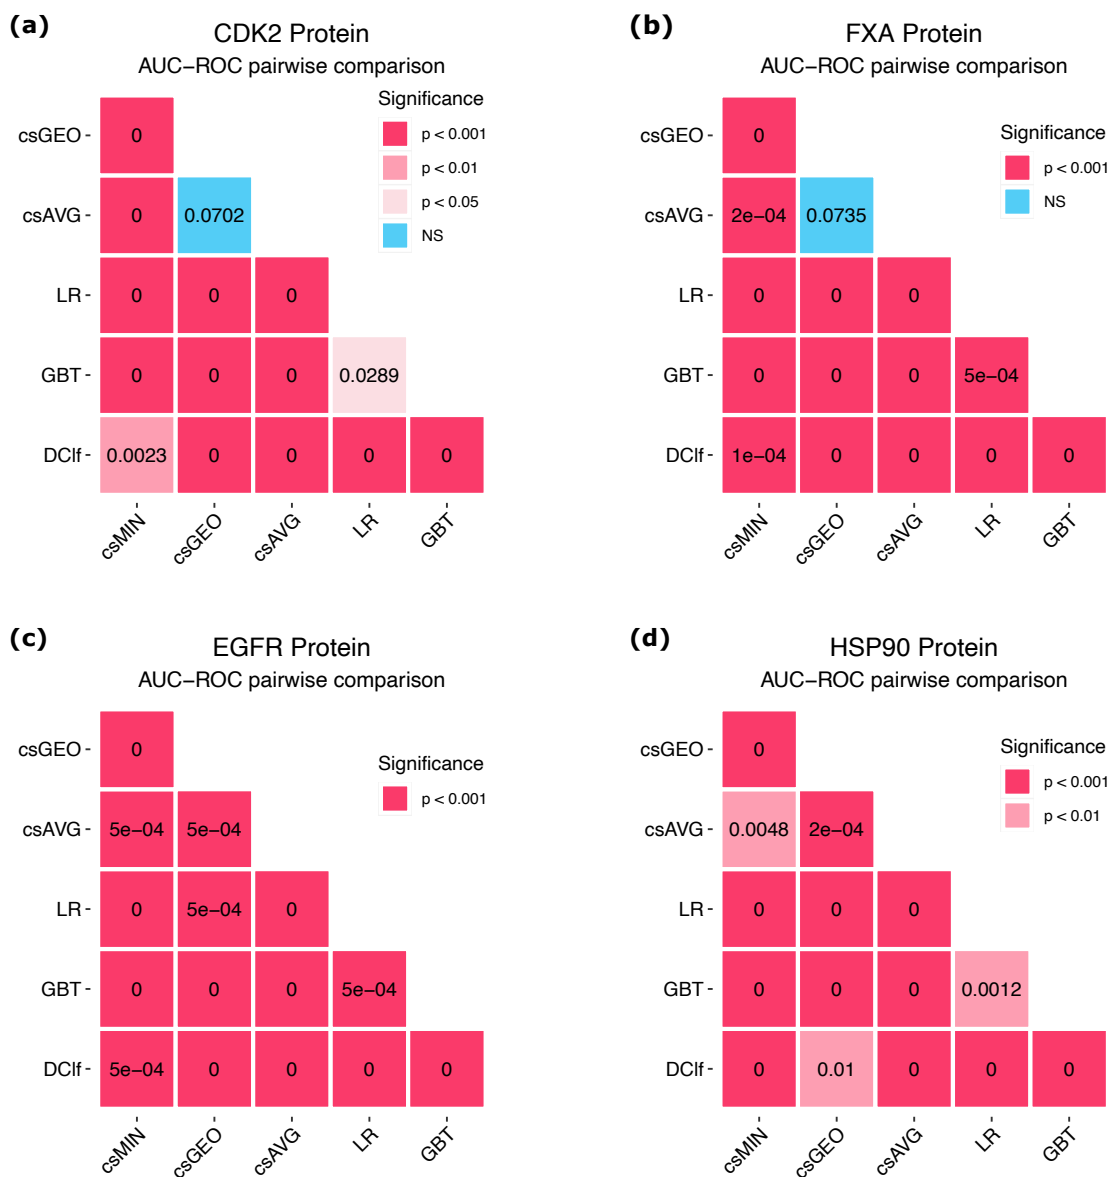

Figure S3: Pairwise comparison between virtual screening methods' AUC-ROC performances using the Nemenyi pos-hoc test. (a) CDK2 protein results. (b) FXa protein results. (c) EGFR protein results. (d) HSP90 protein results. The virtual screening methods compared are: *LR*: Logistic Regression; *GBT*: Gradient Boosting Trees; *DClf*: Dummy Classifier; *csAVG*: average; *csGEO*: geometric mean; *csMIN*: minimum.



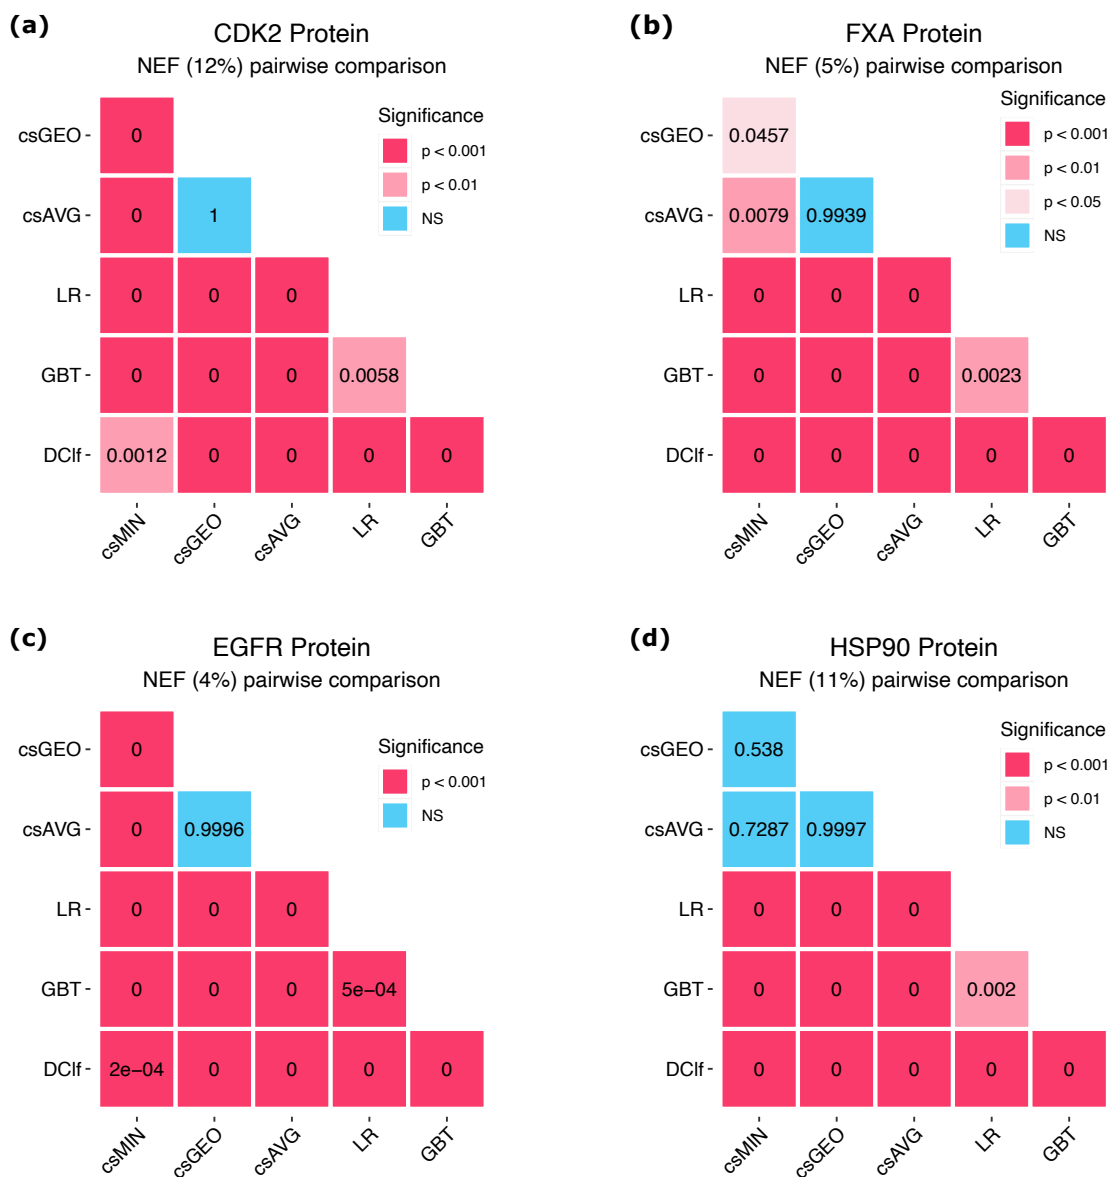

Figure S4: Pairwise comparison between virtual screening methods' Normalized enrichment factor (NEF) performances using the Nemenyi pos-hoc test. (a) CDK2 protein results. (b) FXa protein results. (c) EGFR protein results. (d) HSP90 protein results. The virtual screening methods compared are: *LR*: Logistic Regression; *GBT*: Gradient Boosting Trees; *DClf*: Dummy Classifier; *csAVG*: average; *csGEO*: geometric mean; *csMIN*: minimum.

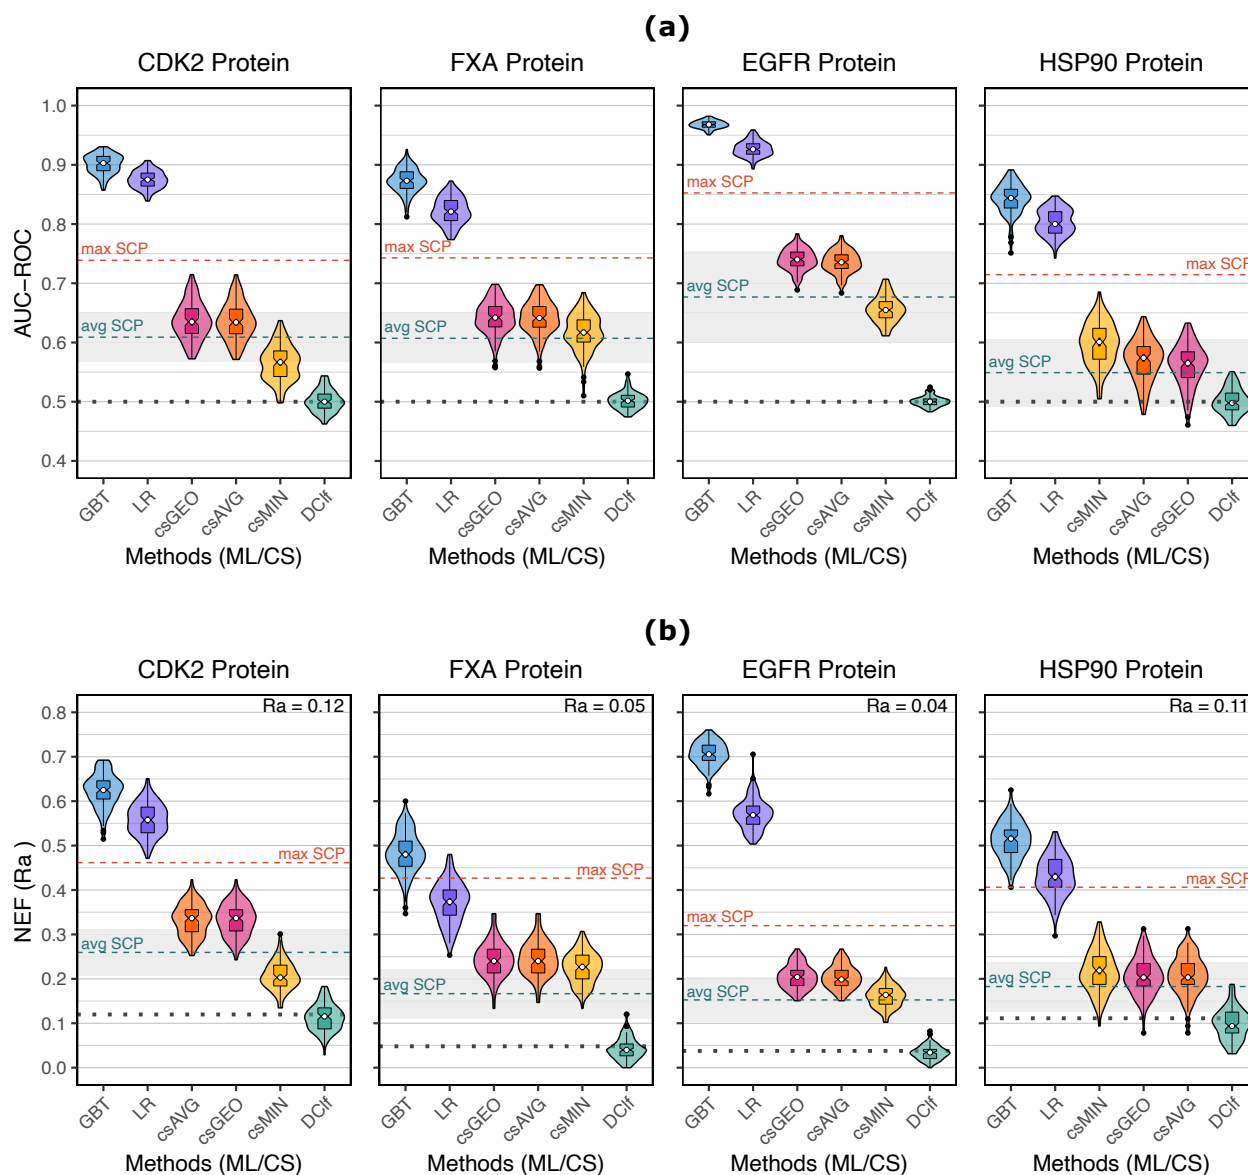

Figure S5: Results from the  $30 \times 4cv$  analysis using the default hyperparameters (Table S1) of the two machine learning algorithms: Logistic Regression and Gradient Boosting trees. (a) AUC-ROC values. (b) NEF values. Violin boxplots showing the distribution of the performance values of each SBVS method across the 30 repetitions. The white points within the boxes indicate the value of the median, and the notches represent the 95% confidence interval around it. Outliers are shown as black points. The max SCP (single-conformation performance) and the avg SCP (average performance) dashed lines indicate the maximum and the average performance, respectively, achieved by a single conformation using the raw docking scores. The translucent gray area surrounding the avg SCP value represents one standard deviation from the average SCP. The dotted black lines indicate the expected performance of a random classifier. The results of the consensus strategies and the SCP values are the same as the Figure 2 of the main manuscript because the same validation sets were evaluated. This was done through the use of a random seed parameter of the *RepeatedKfold* object employed to perform the dataset splitting.

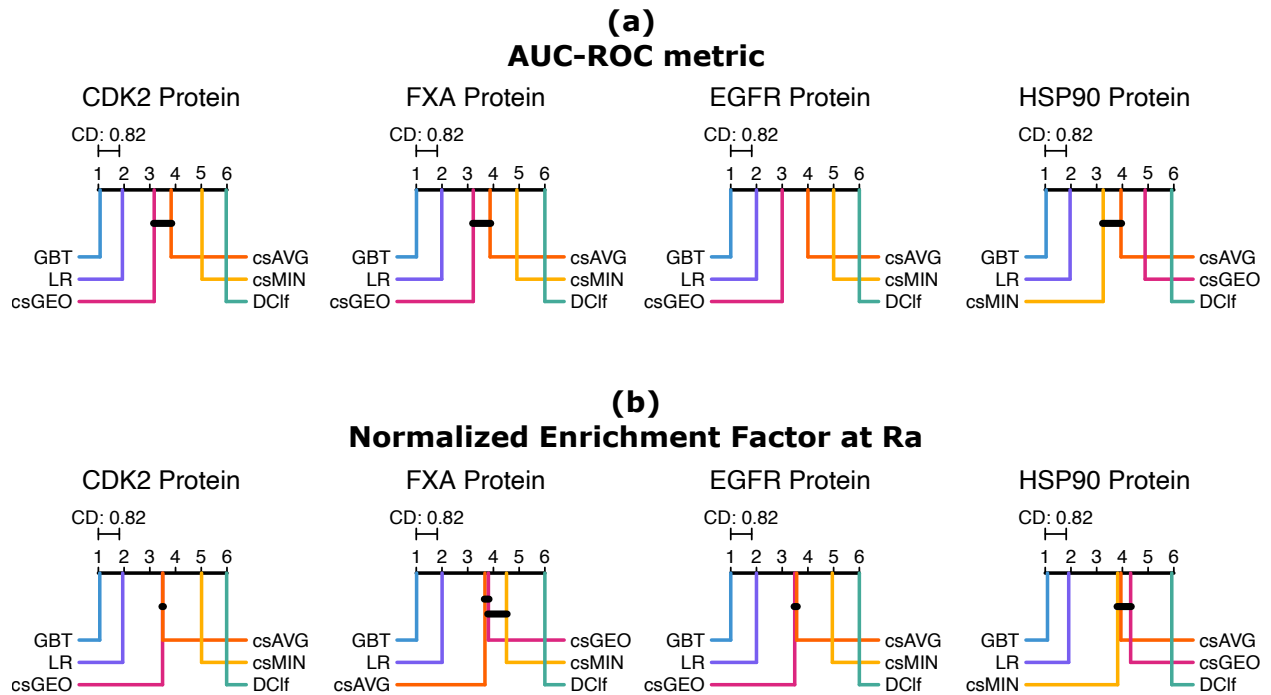

Figure S6: Critical Difference (CD) plots of the pairwise Nemenyi comparison test for the  $30 \times 4cv$  analysis with the ML models using their default hyperparameters (Table S1). SBVS methods with average ranks within the CD (0.82) are not significantly different (at  $\alpha = 0.01$ ).

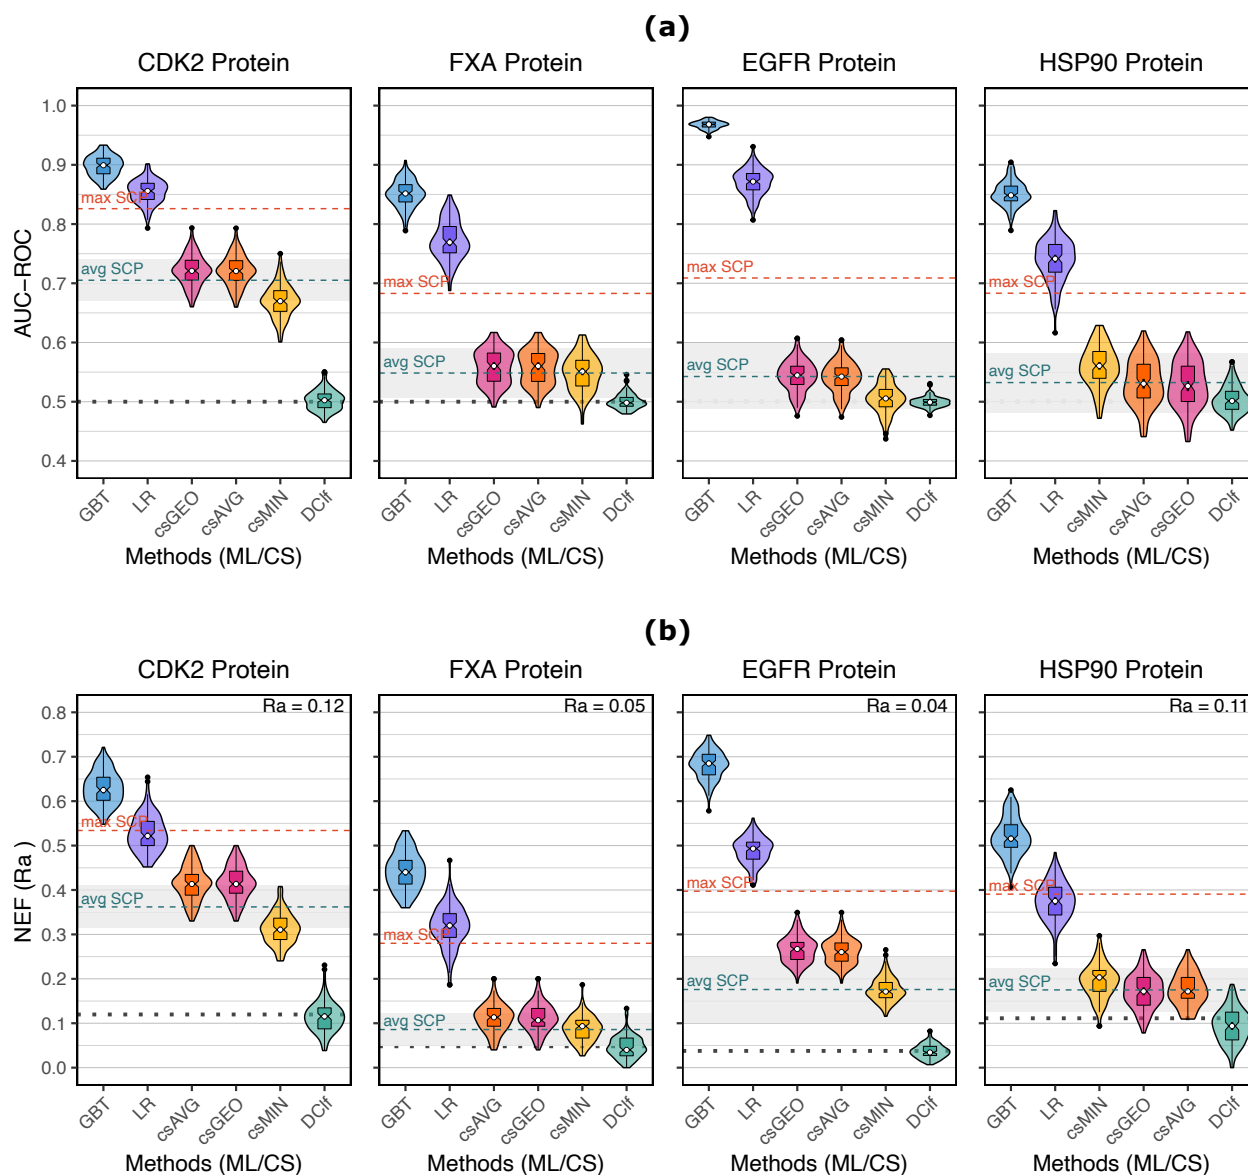

**Figure S7: Results from the  $30 \times 4cv$  analysis using Ligand Efficiency scores, which were computed by dividing the raw docking scores by the number of heavy atoms of each molecule.. (a) AUC-ROC values. (b) NEF values.** Violin boxplots showing the distribution of the performance values of each SBVS method across the 30 repetitions. The white points within the boxes indicate the value of the median, and the notches represent the 95% confidence interval around it. Outliers are shown as black points. The max SCP (single-conformation performance) and the avg SCP dashed lines indicate the maximum and the average performance, respectively, achieved by a single conformation using the raw docking scores. The translucent gray area surrounding the avg SCP value represents one standard deviation from the average SCP. The dotted black lines indicate the expected performance of a random classifier. ML algorithms were trained using their default hyperparameters (Table S1).

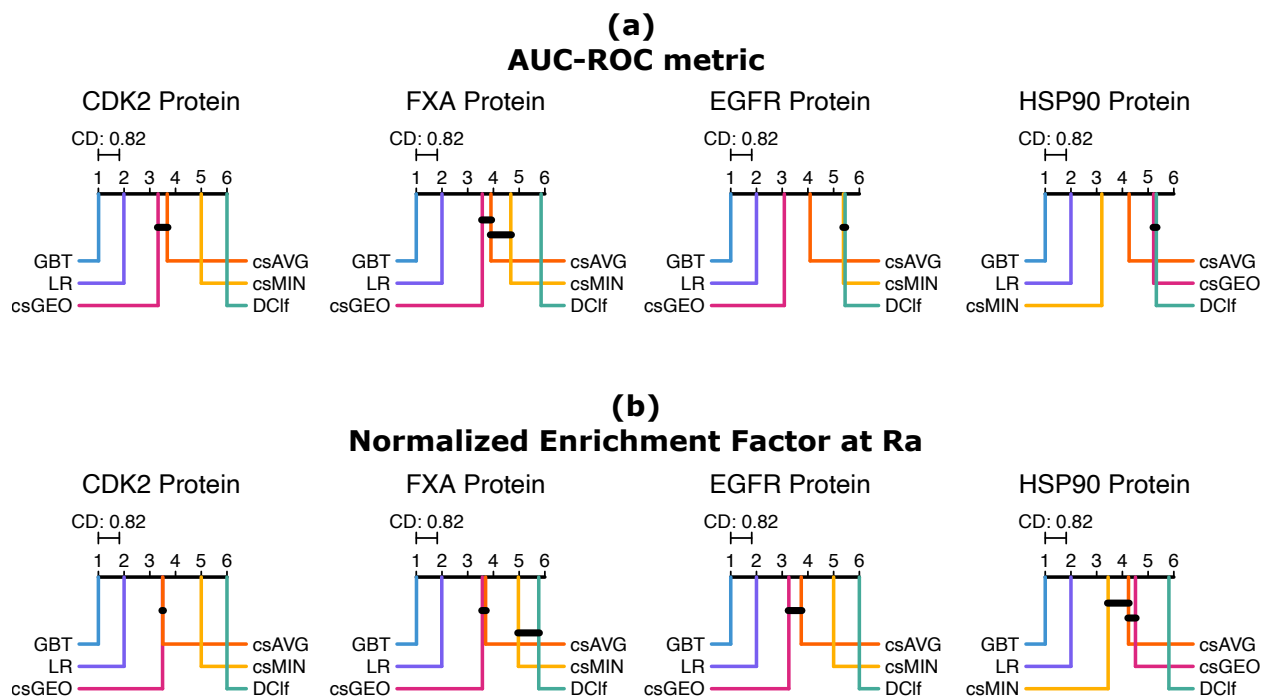

**Figure S8: Critical Difference (CD) plots of the pairwise Nemenyi comparison test for the  $30 \times 4cv$  analysis using the Ligand Efficiency scores.** ML algorithms were trained using their default hyperparameters (Table S1). SBVS methods with average ranks within the CD (0.82) are not significantly different (at  $\alpha = 0.01$ ).

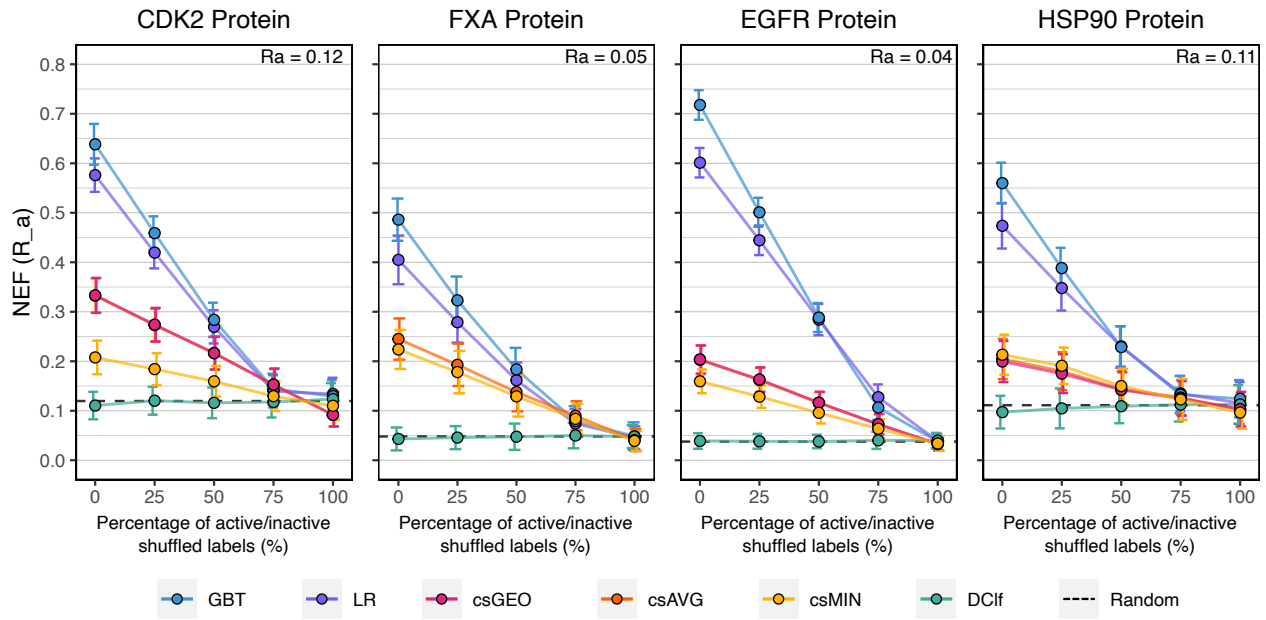

Figure S9: Results of the y-randomization test showing the SBVS methods' average NEF values at different percentages of active/inactive shuffled labels. Error bars indicate standard deviations. The csAVG and csGEO strategies had practically the same average and standard deviation values.

Table S4: Kruskal-Wallis tests for independent samples comparing different percentages of y-randomization per virtual screening method.

|    | Protein     | Metric         | VS_method | n   | KW-statistic | df | p    | signif |
|----|-------------|----------------|-----------|-----|--------------|----|------|--------|
| 1  | <b>CDK2</b> | <b>NEF</b>     | LR        | 600 | 546.15       | 4  | 0.00 | ***    |
| 2  |             |                | GBT       | 600 | 548.33       | 4  | 0.00 | ***    |
| 3  |             |                | Dclf      | 600 | 11.42        | 4  | 0.02 | *      |
| 4  |             |                | csAVG     | 600 | 530.82       | 4  | 0.00 | ***    |
| 5  |             |                | csGEO     | 600 | 530.41       | 4  | 0.00 | ***    |
| 6  |             |                | csMIN     | 600 | 346.07       | 4  | 0.00 | ***    |
| 7  |             | <b>ROC-AUC</b> | LR        | 600 | 545.82       | 4  | 0.00 | ***    |
| 8  |             |                | GBT       | 600 | 546.82       | 4  | 0.00 | ***    |
| 9  |             |                | Dclf      | 600 | 5.23         | 4  | 0.26 | NS     |
| 10 |             |                | csAVG     | 600 | 468.46       | 4  | 0.00 | ***    |
| 11 |             |                | csGEO     | 600 | 469.66       | 4  | 0.00 | ***    |
| 12 |             |                | csMIN     | 600 | 278.21       | 4  | 0.00 | ***    |
| 13 | <b>Fxa</b>  | <b>NEF</b>     | LR        | 600 | 546.48       | 4  | 0.00 | ***    |
| 14 |             |                | GBT       | 600 | 549.58       | 4  | 0.00 | ***    |
| 15 |             |                | Dcld      | 600 | 6.70         | 4  | 0.15 | NS     |
| 16 |             |                | csAVG     | 600 | 494.44       | 4  | 0.00 | ***    |
| 17 |             |                | csGEO     | 600 | 493.25       | 4  | 0.00 | ***    |
| 18 |             |                | csMIN     | 600 | 478.56       | 4  | 0.00 | ***    |
| 19 |             | <b>ROC-AUC</b> | LR        | 600 | 549.01       | 4  | 0.00 | ***    |
| 20 |             |                | GBT       | 600 | 552.51       | 4  | 0.00 | ***    |
| 21 |             |                | Dclf      | 600 | 0.97         | 4  | 0.92 | NS     |
| 22 |             |                | csAVG     | 600 | 421.09       | 4  | 0.00 | ***    |
| 23 |             |                | csGEO     | 600 | 423.57       | 4  | 0.00 | ***    |
| 24 |             |                | csMIN     | 600 | 359.09       | 4  | 0.00 | ***    |

Each row shows the Kruskal-Wallis<sup>5</sup> test results of each virtual screening method after comparing the performance of five percentages of y-randomization (0, 25, 50, 75, and 100%).

Table S4: (Continuation) Kruskal-Wallis tests for independent samples comparing different percentages of y-randomization per virtual screening method.

|    | Protein      | Metric         | VS_method | n      | KW-statistic | df   | p    | signif |
|----|--------------|----------------|-----------|--------|--------------|------|------|--------|
| 25 | <b>EGFR</b>  | <b>NEF</b>     | LR        | 600    | 575.04       | 4    | 0.00 | ***    |
| 26 |              |                | GBT       | 600    | 574.34       | 4    | 0.00 | ***    |
| 27 |              |                | Dclf      | 600    | 1.59         | 4    | 0.81 | NS     |
| 28 |              |                | csAVG     | 600    | 534.35       | 4    | 0.00 | ***    |
| 29 |              |                | csGEO     | 600    | 535.36       | 4    | 0.00 | ***    |
| 30 |              |                | csMIN     | 600    | 502.66       | 4    | 0.00 | ***    |
| 31 |              | <b>ROC-AUC</b> | LR        | 600    | 573.45       | 4    | 0.00 | ***    |
| 32 |              |                | GBT       | 600    | 570.70       | 4    | 0.00 | ***    |
| 33 |              |                | Dclf      | 600    | 5.27         | 4    | 0.26 | NS     |
| 34 |              |                | csAVG     | 600    | 564.28       | 4    | 0.00 | ***    |
| 35 | csGEO        |                | 600       | 565.35 | 4            | 0.00 | ***  |        |
| 36 | csMIN        |                | 600       | 522.66 | 4            | 0.00 | ***  |        |
| 37 | <b>HSP90</b> | <b>NEF</b>     | LR        | 600    | 533.08       | 4    | 0.00 | ***    |
| 38 |              |                | GBT       | 600    | 532.68       | 4    | 0.00 | ***    |
| 39 |              |                | Dclf      | 600    | 13.33        | 4    | 0.01 | **     |
| 40 |              |                | csAVG     | 600    | 304.57       | 4    | 0.00 | ***    |
| 41 |              |                | csGEO     | 600    | 281.23       | 4    | 0.00 | ***    |
| 42 |              |                | csMIN     | 600    | 353.34       | 4    | 0.00 | ***    |
| 43 |              | <b>ROC-AUC</b> | LR        | 600    | 535.62       | 4    | 0.00 | ***    |
| 44 |              |                | GBT       | 600    | 532.06       | 4    | 0.00 | ***    |
| 45 |              |                | Dclf      | 600    | 5.69         | 4    | 0.22 | NS     |
| 46 |              |                | csAVG     | 600    | 297.10       | 4    | 0.00 | ***    |
| 47 | csGEO        |                | 600       | 264.91 | 4            | 0.00 | ***  |        |
| 48 | csMIN        |                | 600       | 380.54 | 4            | 0.00 | ***  |        |

Each row shows the Kruskal-Wallis<sup>5</sup> test results of each virtual screening method after comparing the performance of five percentages of y-randomization (0, 25, 50, 75, and 100%).



Table S5: Dunn’s post hoc test<sup>6</sup> for pairwise comparison between pair or percentages (pct.) of y-randomization per virtual screening method. Only non-significant differences are shown.

|   | Protein | Metric  | VS method <sup>a</sup> | pct. 1 | pct. 2 | n   | Dunn’s statistic | p    | p.adj | p.adj sig. |
|---|---------|---------|------------------------|--------|--------|-----|------------------|------|-------|------------|
| 1 | CDK2    | NEF     | LR                     | 75%    | 100%   | 120 | -0.41            | 0.69 | 0.69  | ns         |
| 2 | CDK2    | NEF     | GBT                    | 75%    | 100%   | 120 | -1.44            | 0.15 | 0.15  | ns         |
| 3 | CDK2    | ROC-AUC | LR                     | 75%    | 100%   | 120 | 0.51             | 0.61 | 0.61  | ns         |
| 4 | CDK2    | ROC-AUC | GBT                    | 75%    | 100%   | 120 | 0.77             | 0.44 | 0.44  | ns         |
| 5 | HSP90   | NEF     | LR                     | 75%    | 100%   | 120 | -1.53            | 0.13 | 0.13  | ns         |
| 6 | HSP90   | NEF     | GBT                    | 75%    | 100%   | 120 | -0.74            | 0.46 | 0.46  | ns         |
| 7 | HSP90   | ROC-AUC | LR                     | 75%    | 100%   | 120 | -1.18            | 0.24 | 0.24  | ns         |
| 8 | HSP90   | ROC-AUC | GBT                    | 75%    | 100%   | 120 | -0.80            | 0.42 | 0.42  | ns         |

Dunn’s test was applied among different percentages of y-randomization (0, 25, 50, 75, and 100%) per each virtual screening method, regarding a specific protein and a specific performance metric. Only non-significant differences are shown. Full results can be consulted in the GitHub repository: [jRicciL/ML-ensemble-docking](https://github.com/jRicciL/ML-ensemble-docking)

<sup>a</sup> The Dummy Classifier results, all of them non-significant, are omitted.

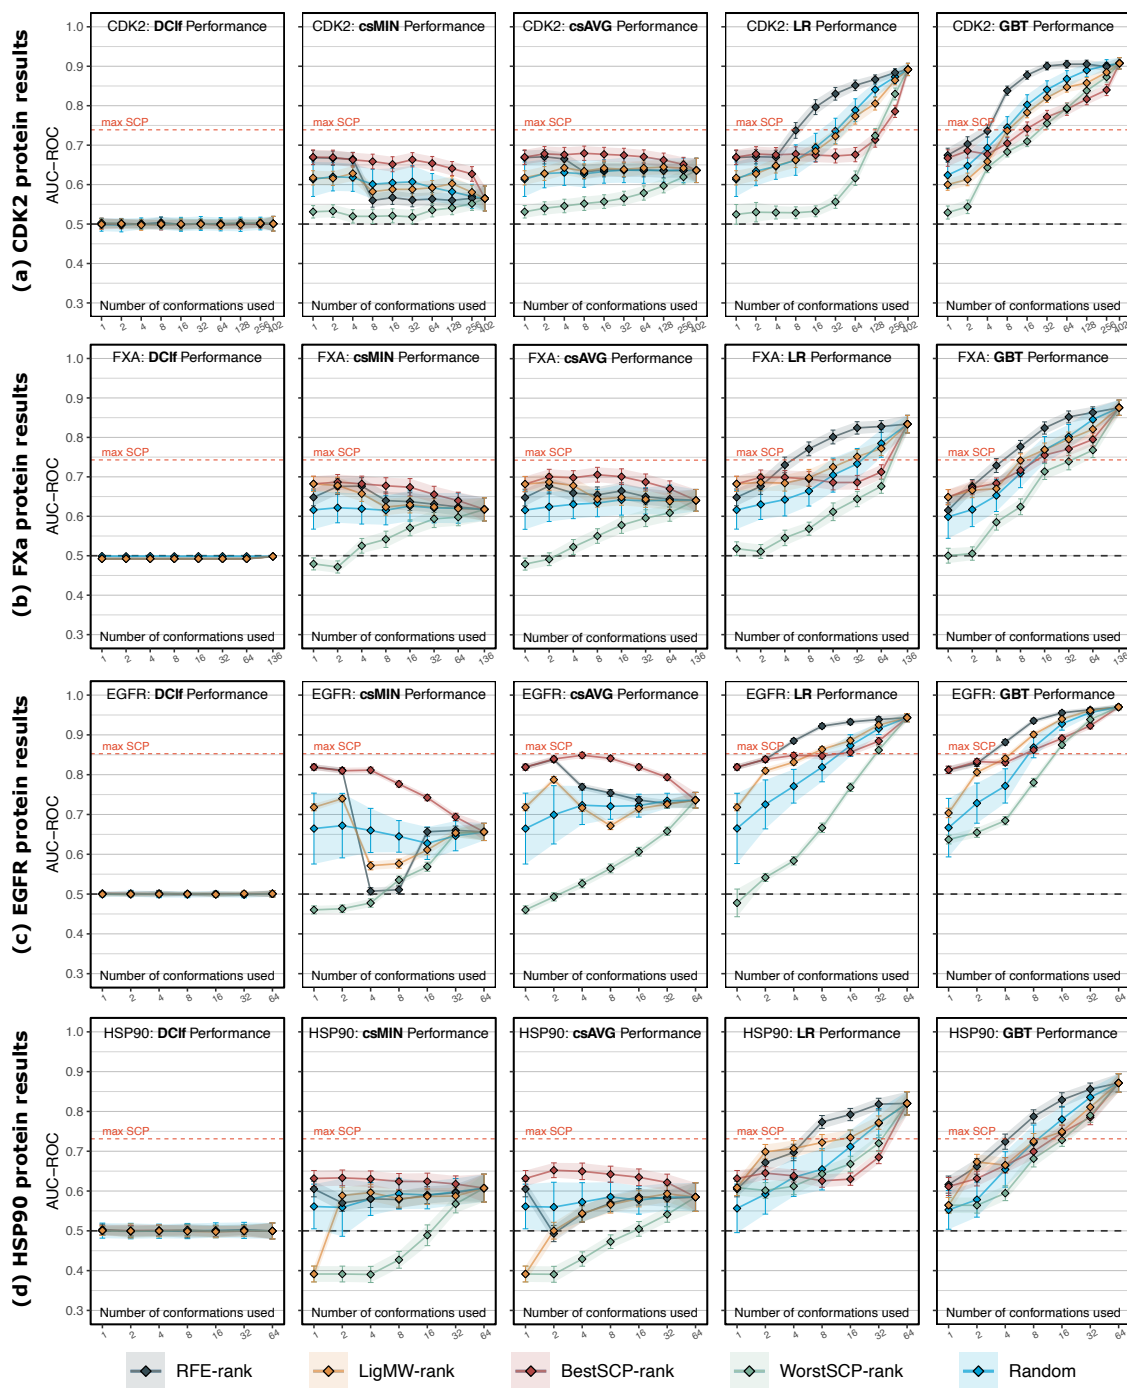

Figure S10: Comparison between the average AUC-ROC performance between machine learning classifiers and traditional consensus strategies using only  $k$  protein conformations. Five different selection criteria are compared. Error bars indicate standard deviations. The max SCP dashed line indicates the maximum performance achieved by a single conformation using the raw docking scores from the  $120 \times n$  validation sets generated during the  $30 \times 4cv$  analysis, where all  $n$  conformations were considered. (a) CDK2 protein results. (b) FXa protein results ( $k = 128$  values are omitted for clarity). (c) EGFR protein results. (d) HSP90 protein results. csGEO is omitted for simplicity as its results are similar to the csAVG strategy. Full results can be consulted in the Github repository: [jRicciL/ML-ensemble-docking](https://github.com/jRicciL/ML-ensemble-docking)

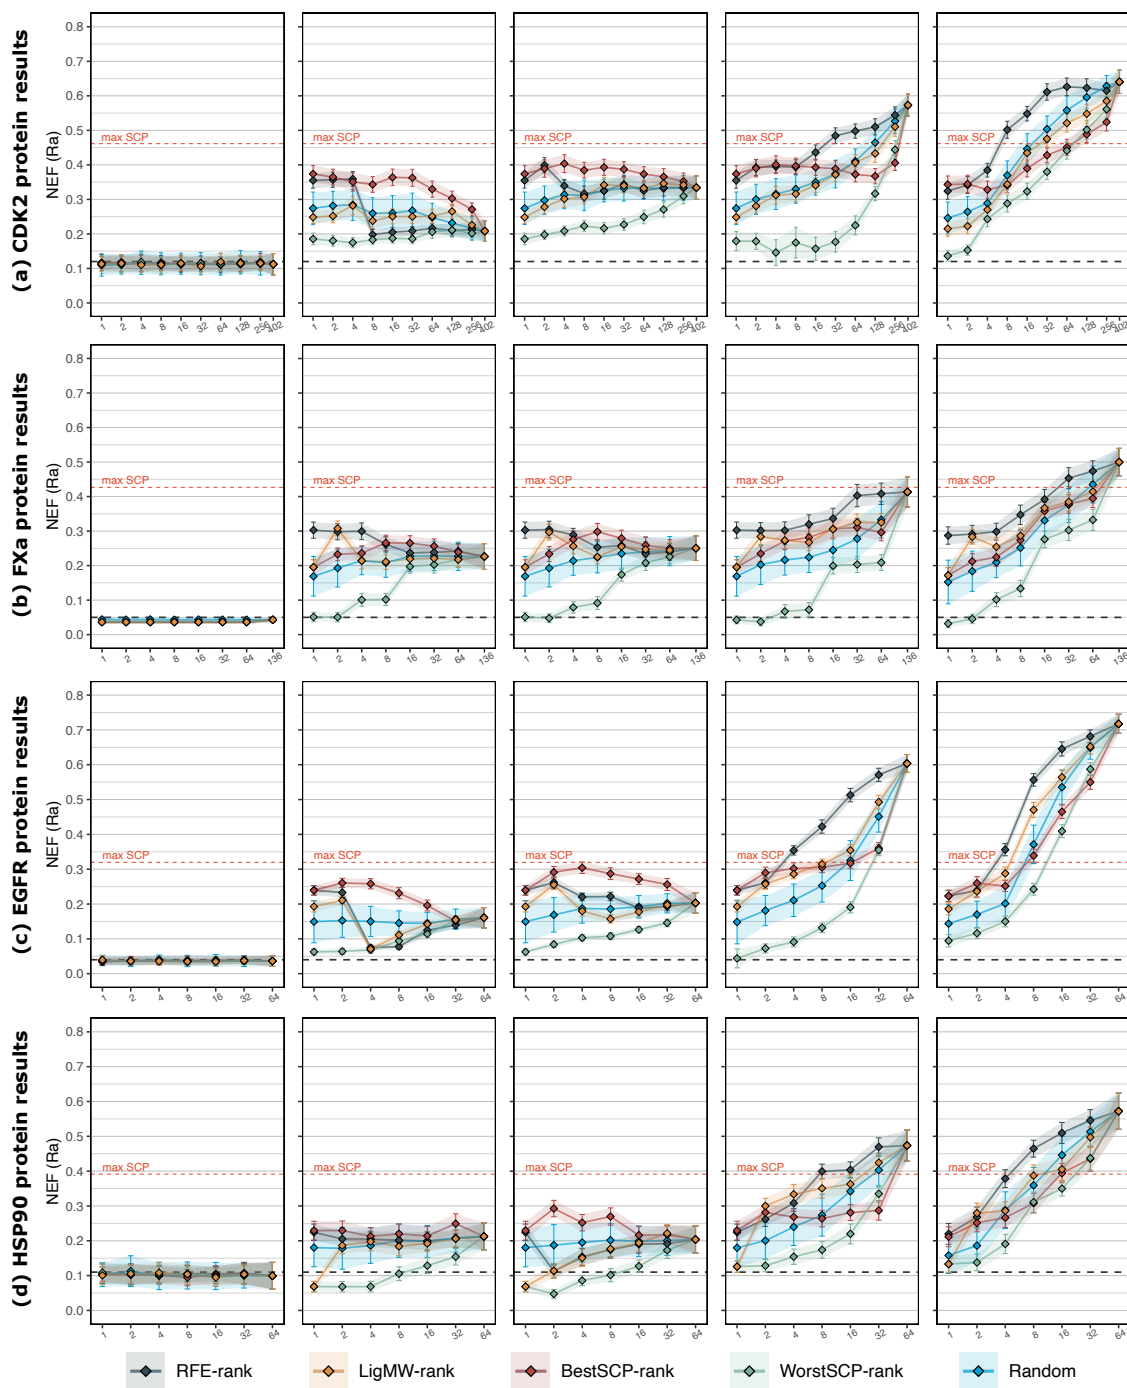

Figure S11: Comparison between the average NEF performance between machine learning classifiers and traditional consensus strategies using only  $k$  protein conformations. Five different selection criteria are compared. Error bars indicate standard deviations. The max SCP dashed line indicates the maximum performance achieved by a single conformation using the raw docking scores from the  $120 \times n$  validation sets generated during the  $30 \times 4cv$  analysis, where all  $n$  conformations were considered. (a) CDK2 protein results. (b) FXa protein results ( $k = 128$  values are omitted for clarity). (c) EGFR protein results. (d) HSP90 protein results. csGEO is omitted for simplicity as its results are similar to the csAVG strategy. Full results can be consulted in the Github repository: [jRicciL/ML-ensemble-docking](https://github.com/jRicciL/ML-ensemble-docking)

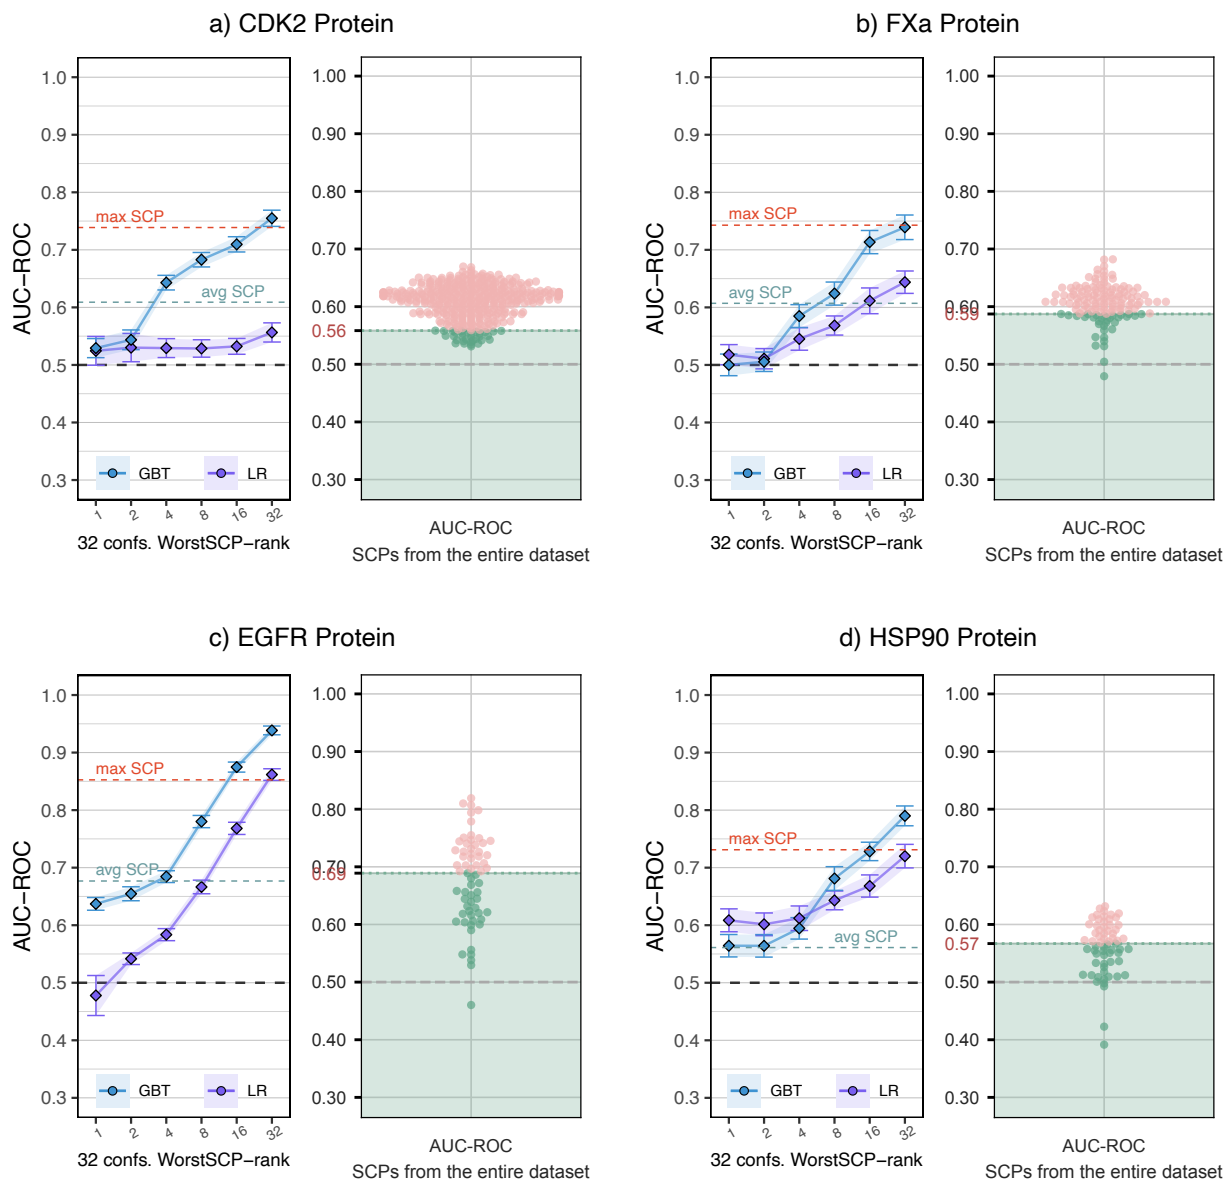

**Figure S12: Gradient Boosting Trees (GBT) and Logistic Regression (LR) classifiers trained with the worst 32 conformations as the input features. (a) CDK2 protein. (b) FXa protein. (c) EGFR protein. (d) HSP90 protein. Line plot panels:** performance of the GBT (blue) and LR (purple) classifiers evaluated with the 30 repetitions of 4-fold stratified cross-validation (30x4cv) using the *worst*  $k$  conformations (WorstSCP-rank). With  $k$  ranging from the 1 to 32 *worst* conformations. The *worst* conformations were determined by their single-conformation performance (SCP) in terms of AUC-ROC computed from the entire dataset. The max SCP and avg SCP, are the maximum and the average values, respectively, achieved for a single protein using the docking scores from the  $120 \times n$  validation sets generated during the  $30 \times 4cv$  analysis, where all  $n$  conformations were considered (see Figure 2 of the main manuscript). **Swarm plot panels:** SCP (AUC-ROC) values obtained by each protein conformation according to its performance using the raw docking scores from the entire dataset. The 32 conformations with the lowest SCP AUC-ROC values (*worst* conformations) are shown in green.

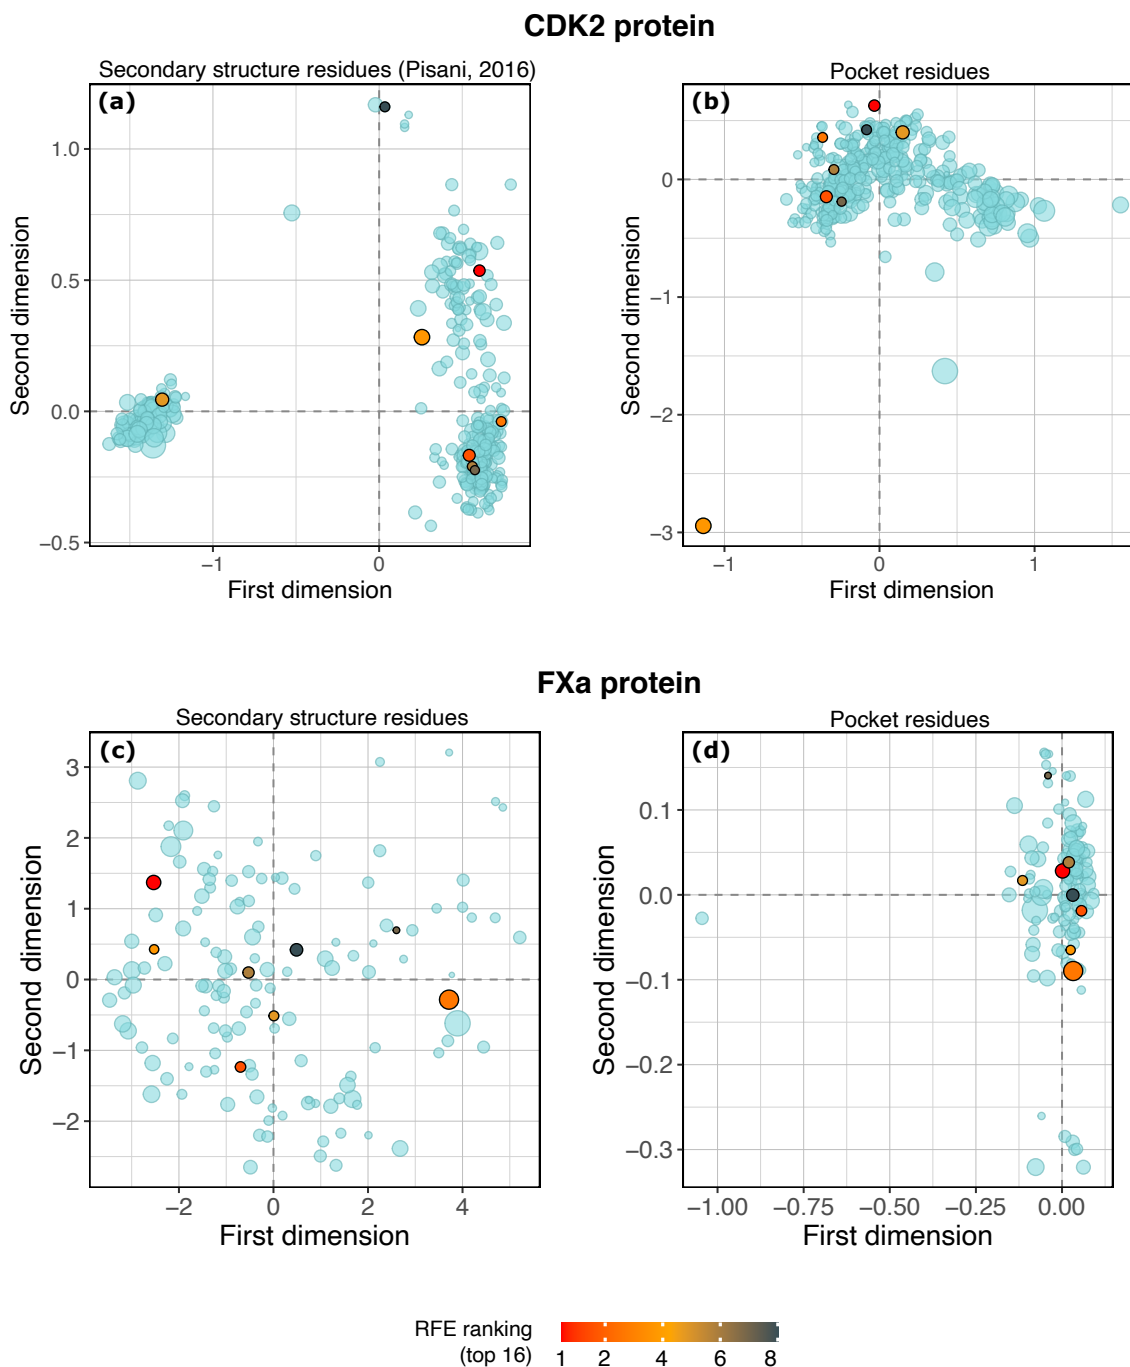

Figure S13: Classical Multidimensional Scaling (cMDS) showing the top 8 (red orange to black points) protein conformations selected by the RFE procedure using GBT as a base estimator. cMDS were computed from the pairwise RMSD matrix considering  $C\alpha$  atoms from protein secondary structure residues, (a) and (c), and protein pocket's residues, (b) and (d). Particularly, in plot (a), we used the same the secondary structure residues used by Pisani et al.<sup>7</sup> Each point represents a protein conformation. The point's size is proportional to the protein pocket's volume, computed by POVME3.<sup>8</sup>

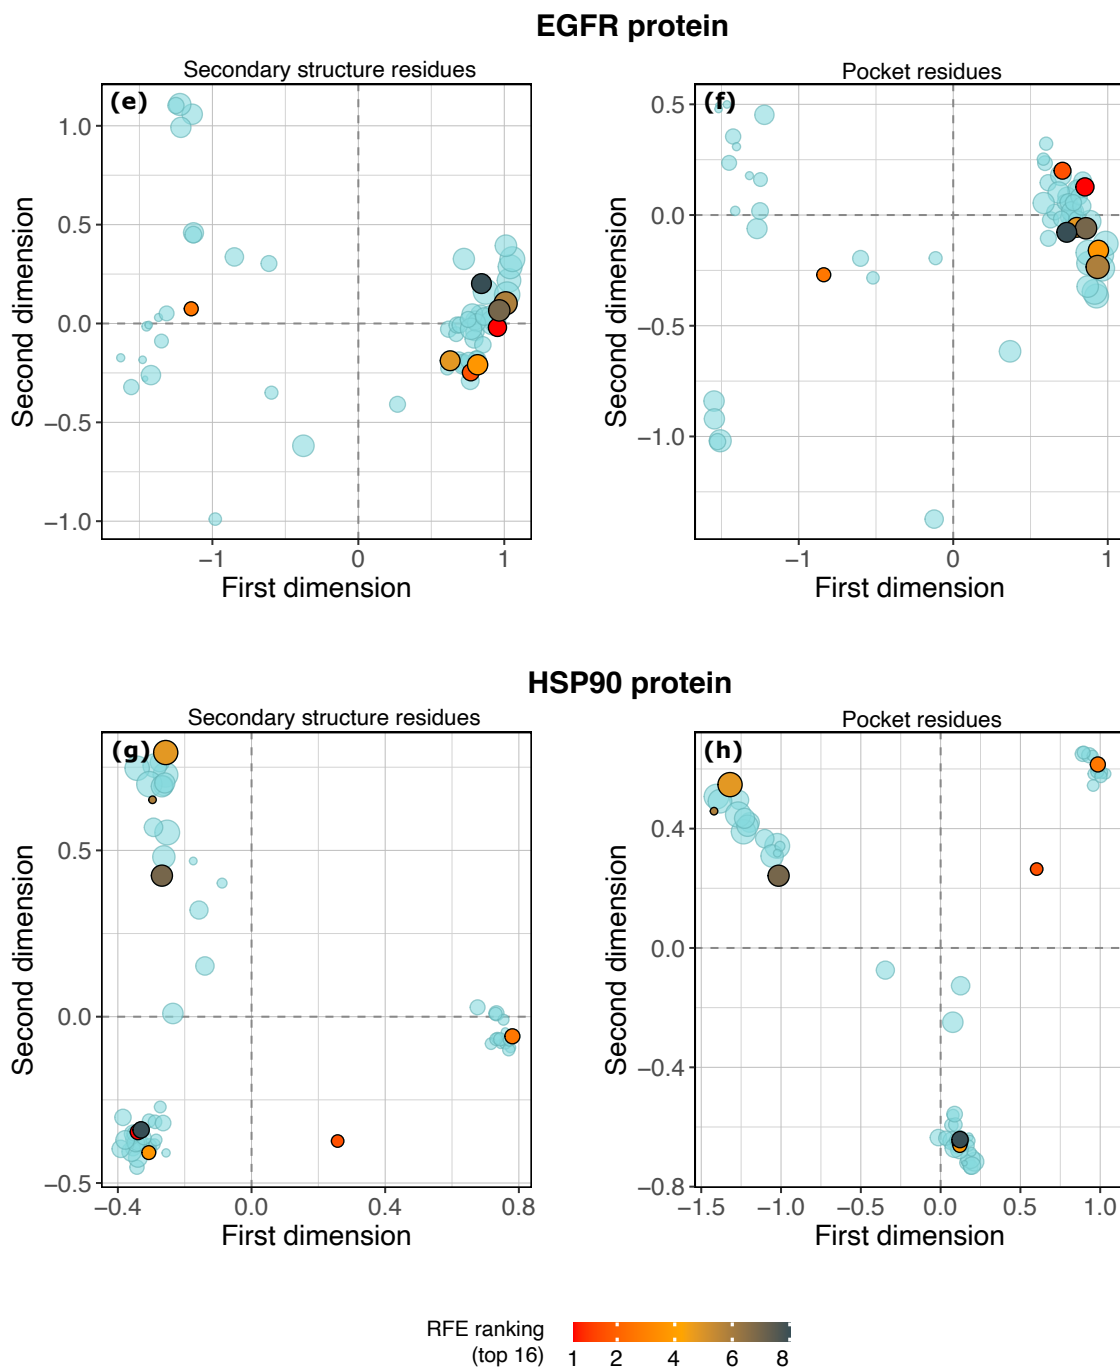

Figure S13: (Continuation) Classical Multidimensional Scaling (cMDS) showing the top 8 (red orange to black points) protein conformations selected by the RFE procedure using GBT as a base estimator. cMDS were computed from the pairwise RMSD matrix considering  $C\alpha$  atoms from protein secondary structure residues, (e) and (g), and protein pocket's residues, (f) and (h). The point's size is proportional to the protein pocket's volume, computed by POVME3.<sup>8</sup>

### (a) AUC-ROC

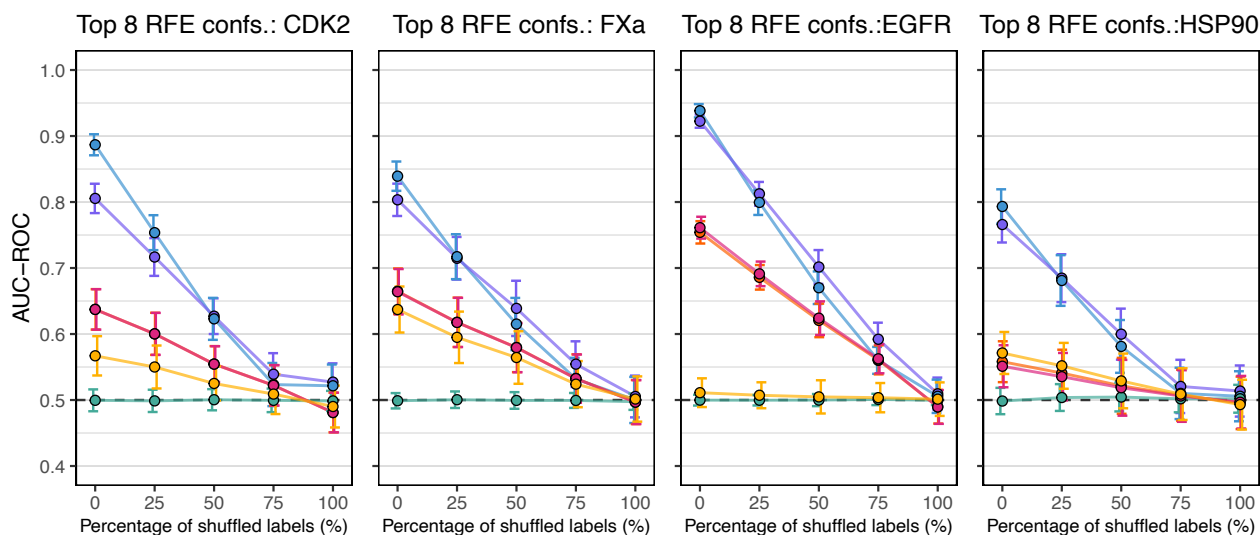

### (b) Normalized Enrichment Factor

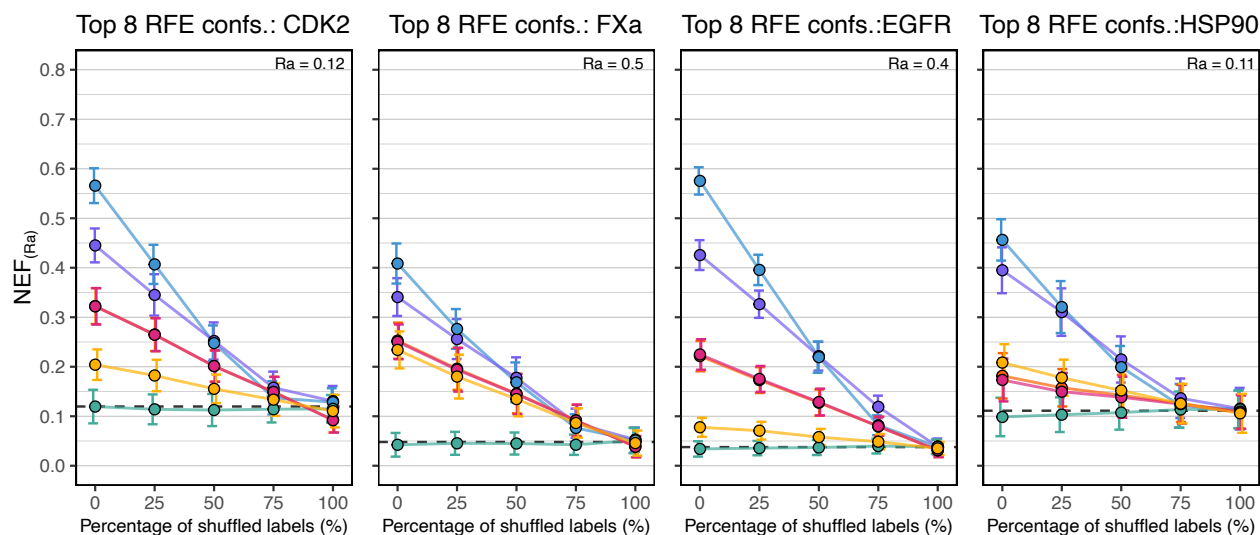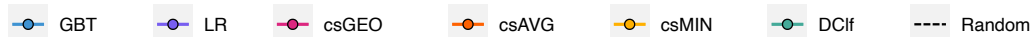

Figure S14: Results of the y-randomization test using the top 8 conformations selected by the RFE procedure. The VS methods' average performances are shown at different percentages of active/inactive shuffled labels. Error bars indicate standard deviations. (a) AUC-ROC values. (b) NEF values. The csAVG and csGEO strategies had practically the same average and standard deviation values.

Table S6: CDK2 protein. Top 9 molecules as judged by the GBT classifier after the 30×4cv implementation. Ranks according to the other methods are also shown.

| Library | Lig. Name | Activity | rank LR | rank GBT | rank csAVG | rank csGEO | rank csMIN | MW    | Num. atoms | Num. rots |
|---------|-----------|----------|---------|----------|------------|------------|------------|-------|------------|-----------|
| COCRY5  | 03Z       | Active   | 135     | <b>1</b> | 113        | 112        | 236        | 374.4 | 25         | 5         |
| CSAR    | CS13      | Active   | 4       | <b>2</b> | 588        | 588        | 1098       | 316.8 | 21         | 3         |
| COCRY5  | FRV       | Active   | 36      | <b>3</b> | 103        | 105        | 400        | 384.5 | 27         | 6         |
|         | 04Z       | Active   | 193     | <b>4</b> | 95         | 93         | 232        | 406.5 | 27         | 6         |
| DUD     | ligand_61 | Active   | 2       | <b>5</b> | 495        | 515        | 1374       | 304.3 | 23         | 2         |
| COCRY5  | X40       | Active   | 99      | <b>6</b> | 106        | 106        | 335        | 375.4 | 25         | 5         |
|         | CDK       | Active   | 10      | <b>7</b> | 204        | 207        | 419        | 435.5 | 29         | 8         |
| CSAR    | CS14      | Active   | 5       | <b>8</b> | 410        | 413        | 1186       | 300.4 | 21         | 3         |
| COCRY5  | 26Z       | Active   | 47      | <b>9</b> | 36         | 35         | 96         | 389.5 | 26         | 5         |

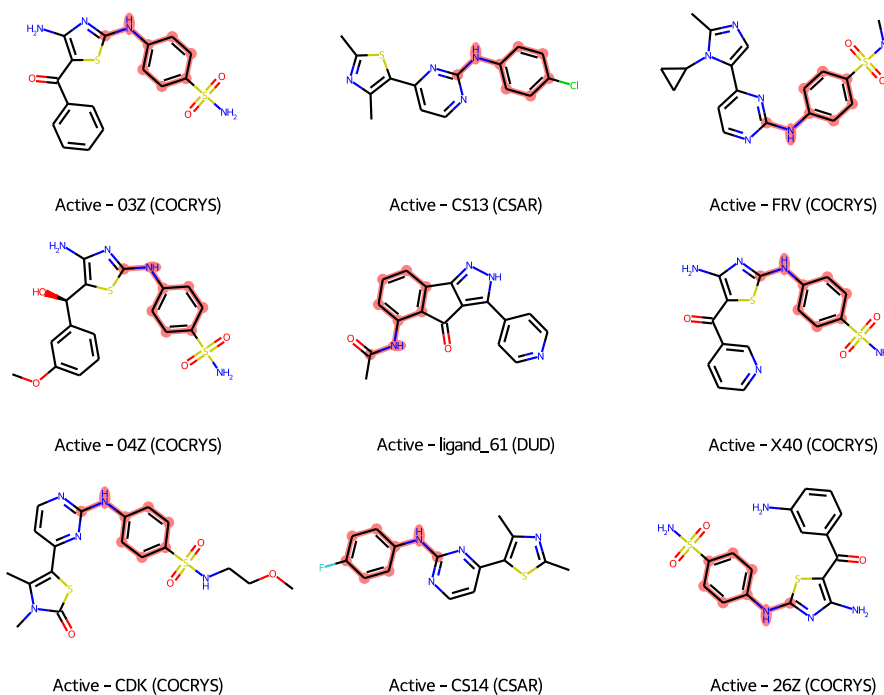

Figure S15: CDK2 protein. Structures of the top 9 molecules as judged by the GBT classifier after the 30×4cv implementation. The maximum common substructure is highlighted in red (*rdkit: completeRingsOnly = False*). An extended version can be consulted in the GitHub repository: [jRicciL/ML-ensemble-docking](https://github.com/jRicciL/ML-ensemble-docking)



Table S7: CDK2 protein. Top 9 molecules as judged by the csMIN classifier after the 30×4cv implementation. Ranks according to the other methods are also shown.

| Library | Lig. Name  | Activity | rank LR | rank GBT | rank csAVG | rank csGEO | rank csMIN | MW    | Num. atoms | Num. rots |
|---------|------------|----------|---------|----------|------------|------------|------------|-------|------------|-----------|
| COCRYS  | LQ5        | Active   | 232     | 247      | 209        | 208        | <b>1</b>   | 503.5 | 36         | 6         |
| DEKOIS  | decoy_1191 | Inactive | 1537    | 178      | 3          | 3          | <b>2</b>   | 484.5 | 36         | 7         |
| COCRYS  | 2KD        | Active   | 1376    | 487      | 21         | 22         | <b>3</b>   | 503.9 | 36         | 7         |
| DEKOIS  | decoy_722  | Inactive | 2649    | 378      | 15         | 15         | <b>4</b>   | 543.5 | 37         | 9         |
| CSAR    | CS112      | Inactive | 3131    | 357      | 82         | 89         | <b>5</b>   | 421.4 | 31         | 8         |
| DEKOIS  | decoy_1063 | Inactive | 2273    | 139      | 4          | 4          | <b>6</b>   | 434.5 | 33         | 6         |
| COCRYS  | EZR        | Active   | 101     | 117      | 67         | 67         | <b>7</b>   | 454.6 | 34         | 4         |
| DEKOIS  | decoy_755  | Inactive | 515     | 265      | 42         | 41         | <b>8.5</b> | 393.4 | 29         | 4         |
|         | decoy_1175 | Inactive | 2222    | 342      | 15         | 16         | <b>8.5</b> | 504.6 | 37         | 8         |

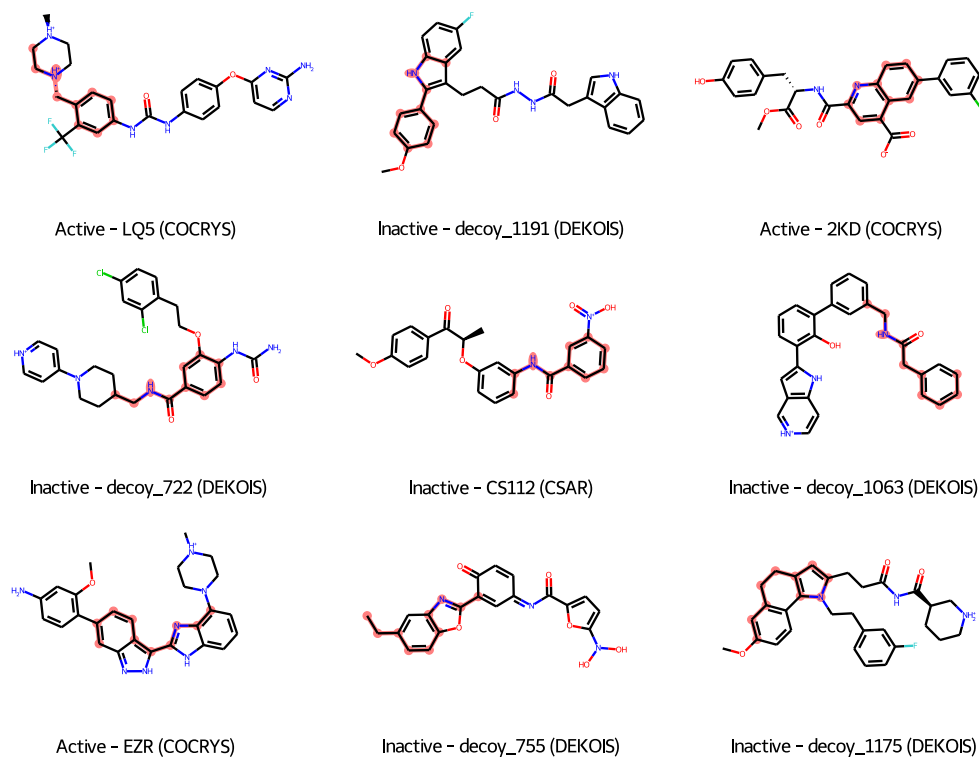

Figure S16: CDK2 protein. Structures of the top 9 molecules as judged by the csMIN classifier after the 30×4cv implementation. The maximum common substructure is highlighted in red (*rdkit: completeRingsOnly = False*). An extended version can be consulted in the GitHub repository.

Table S8: FXa protein. Top 9 molecules as judged by the GBT classifier after the 30×4cv implementation. Ranks according to the other methods are also shown.

| Library | Lig. Name  | Activity | rank LR | rank GBT | rank csAVG | rank csGEO | rank csMIN | MW    | Num. atoms | Num. rots |
|---------|------------|----------|---------|----------|------------|------------|------------|-------|------------|-----------|
| DUD     | ligand_90  | Active   | 4       | <b>1</b> | 2831       | 2858       | 1541       | 426.5 | 32         | 6         |
|         | ligand_118 | Active   | 21      | <b>2</b> | 2034       | 2007       | 2988       | 432.9 | 31         | 6         |
| COCRYS  | IVK        | Active   | 3       | <b>3</b> | 83         | 102        | 26         | 537.9 | 37         | 6         |
| DUD     | decoy_5325 | Inactive | 1       | <b>4</b> | 7          | 7          | 6          | 539.5 | 38         | 5         |
|         | ligand_91  | Active   | 39      | <b>5</b> | 2248       | 2221       | 3140       | 412.5 | 31         | 6         |
|         | ligand_103 | Active   | 49      | <b>6</b> | 3013       | 2979       | 3650       | 477.4 | 31         | 6         |
|         | decoy_1192 | Inactive | 5       | <b>7</b> | 70         | 71         | 92         | 499.6 | 36         | 5         |
|         | ligand_26  | Active   | 2       | <b>8</b> | 14         | 17         | 18         | 533.5 | 37         | 6         |
| COCRYS  | RR8        | Active   | 7       | <b>9</b> | 29         | 30         | 22         | 533.0 | 36         | 6         |

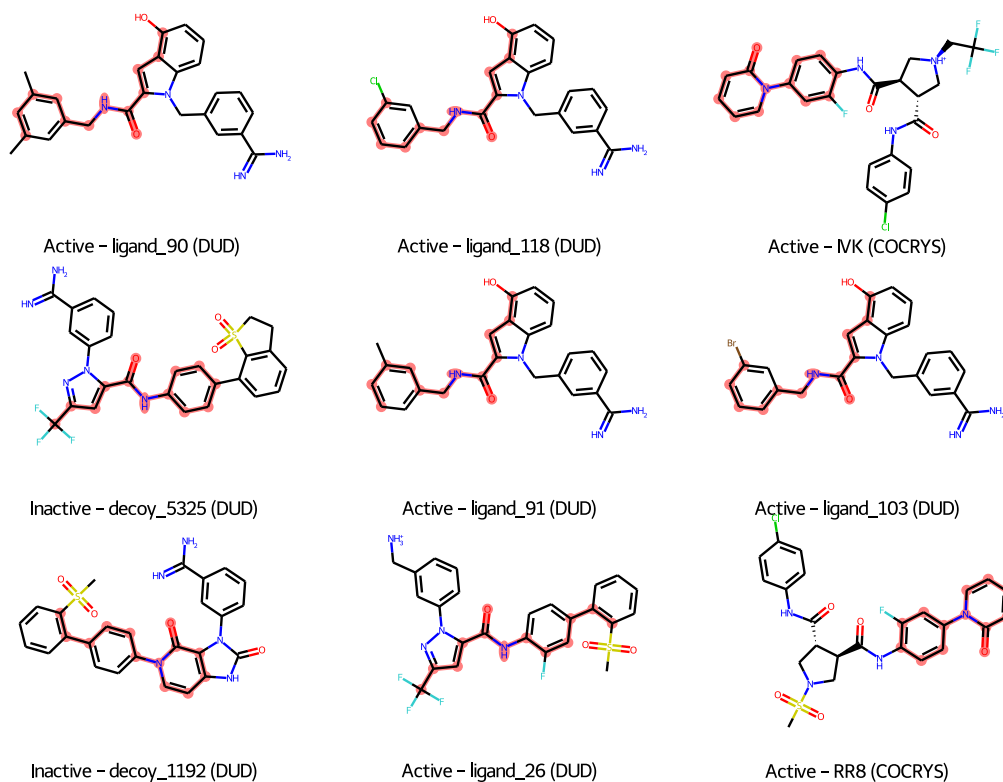

Figure S17: FXa protein. Structures of the top 9 molecules as judged by the GBT classifier after the 30×4cv implementation. The maximum common substructure is highlighted in red (*rdkit*: completeRingsOnly = False). An extended version can be consulted in the GitHub repository.

Table S9: FXa protein. Top 9 molecules as judged by the csMIN classifier after the 30×4cv implementation. Ranks according to the other methods are also shown.

| Library | Lig. Name  | Activity | rank LR | rank GBT | rank csAVG | rank csGEO | rank csMIN | MW    | Num. atoms | Num. rots |
|---------|------------|----------|---------|----------|------------|------------|------------|-------|------------|-----------|
| COCRYS  | LGJ        | Active   | 34      | 56       | 2          | 2          | <b>1</b>   | 586.5 | 41         | 6         |
|         | LGL        | Active   | 45      | 28       | 1          | 1          | <b>2</b>   | 600.6 | 44         | 6         |
|         | LGK        | Active   | 76      | 31       | 15         | 19         | <b>3</b>   | 594.6 | 42         | 5         |
|         | LGM        | Active   | 53      | 13       | 24         | 26         | <b>4</b>   | 546.7 | 41         | 6         |
|         | FFG        | Active   | 191     | 129      | 116        | 117        | <b>5</b>   | 619.6 | 45         | 7         |
| DUD     | decoy_5325 | Inactive | 1       | 4        | 7          | 7          | <b>6</b>   | 539.5 | 38         | 5         |
|         | decoy_4894 | Inactive | 15      | 35       | 8          | 8          | <b>7</b>   | 498.6 | 36         | 5         |
|         | decoy_4854 | Inactive | 57      | 50       | 27         | 26         | <b>8</b>   | 490.6 | 35         | 8         |
| DEKOIS  | ligand_4   | Active   | 40      | 37       | 5          | 5          | <b>9</b>   | 475.6 | 34         | 6         |

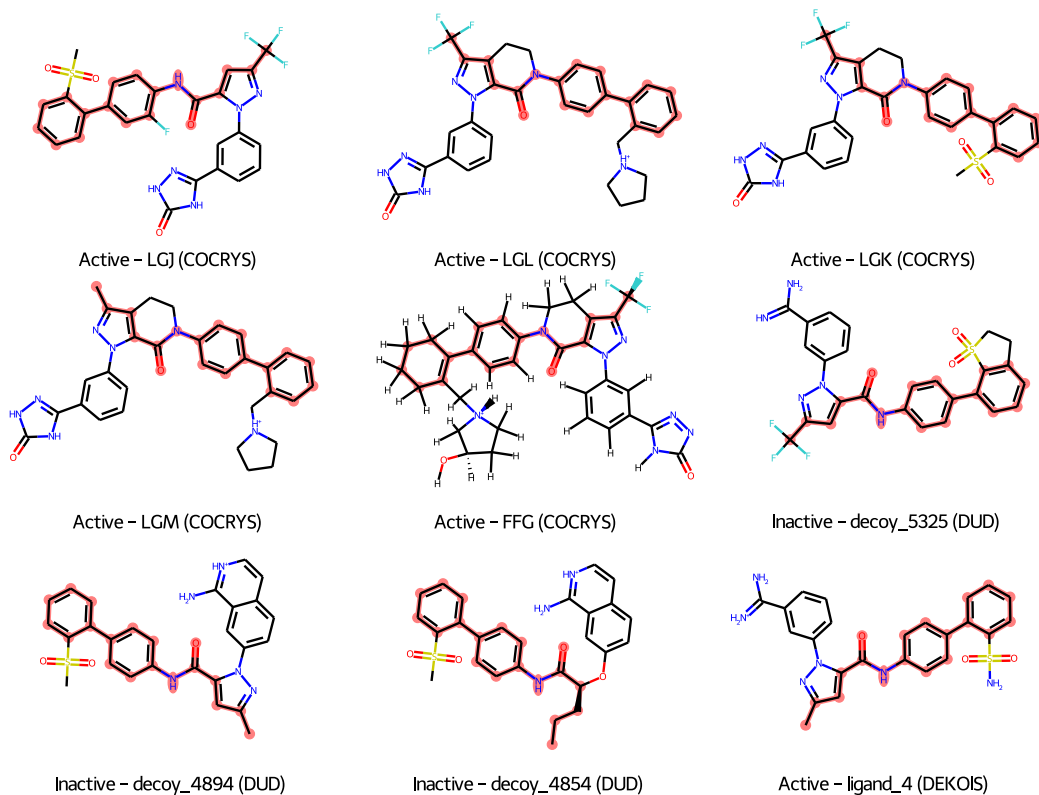

Figure S18: FXa protein. Structures of the top 9 molecules as judged by the csMIN classifier after the 30×4cv implementation. The maximum common substructure is highlighted in red (*rdkit:completeRingsOnly* = False). An extended version can be consulted in the GitHub repository.

Table S10: EGFR protein. Top 9 molecules as judged by the GBT classifier after the 30×4cv implementation. Ranks according to the other methods are also shown.

| Library | Lig. Name  | Activity | rank LR | rank GBT | rank csAVG | rank csGEO | rank csMIN | MW    | Num. atoms | Num. rots |
|---------|------------|----------|---------|----------|------------|------------|------------|-------|------------|-----------|
| DUD     | ligand_24  | Active   | 133     | 1        | 9389       | 9203       | 9334       | 255.7 | 18         | 2         |
|         | ligand_226 | Active   | 124     | 2        | 7767       | 7507       | 8786       | 330.2 | 20         | 3         |
|         | ligand_247 | Active   | 225     | 3        | 8692       | 8514       | 10269      | 335.6 | 19         | 2         |
|         | ligand_71  | Active   | 232     | 4        | 8187       | 7953       | 10432      | 331.2 | 20         | 3         |
|         | ligand_18  | Active   | 225     | 5        | 9448       | 9264       | 9125       | 235.3 | 18         | 2         |
|         | ligand_27  | Active   | 323     | 6        | 10200      | 9998       | 9901       | 300.2 | 18         | 2         |
|         | ligand_140 | Active   | 279     | 7        | 6589       | 6429       | 8893       | 266.3 | 20         | 3         |
|         | ligand_185 | Active   | 111     | 8        | 7103       | 6905       | 6434       | 329.2 | 20         | 3         |
|         | ligand_162 | Active   | 107     | 9        | 10086      | 9832       | 11624      | 331.2 | 20         | 3         |

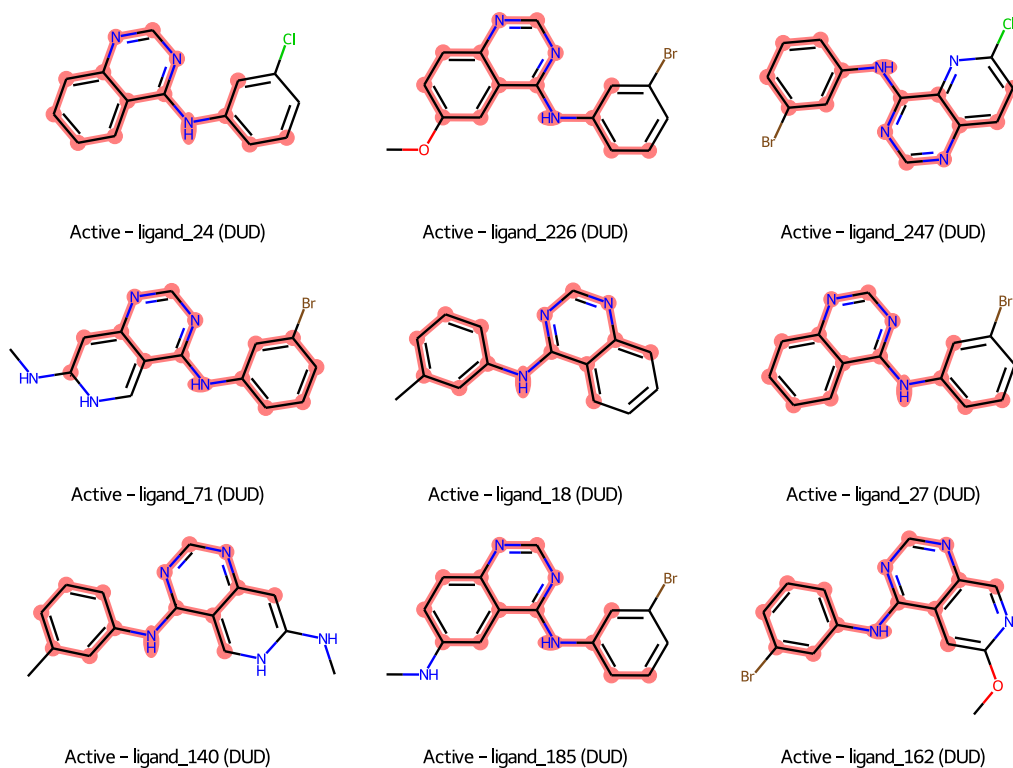

Figure S19: EGFR protein. Structures of the top 9 molecules as judged by the GBT classifier after the 30×4cv implementation. The maximum common substructure is highlighted in red (*rdkit:completeRingsOnly* = False). An extended version can be consulted in the GitHub repository.

Table S11: EGFR protein. Top 9 molecules as judged by the csMIN classifier after the 30×4cv implementation. Ranks according to the other methods are also shown.

| Library | Lig. Name | Activity | rank LR | rank GBT | rank csAVG | rank csGEO | rank csMIN | MW    | Num. atoms | Num. rots |
|---------|-----------|----------|---------|----------|------------|------------|------------|-------|------------|-----------|
| COCRY5  | ITI       | Active   | 12475   | 478      | 38         | 40         | <b>1</b>   | 588.7 | 43         | 7         |
|         | W19       | Active   | 333     | 426      | 8          | 6          | <b>2</b>   | 512.0 | 35         | 6         |
|         | FMM       | Active   | 1272    | 365      | 10         | 17         | <b>3.5</b> | 582.1 | 40         | 11        |
| DEKOIS  | decoy_85  | Inactive | 1722    | 243      | 1          | 2          | <b>3.5</b> | 493.4 | 36         | 8         |
|         | decoy_136 | Inactive | 515     | 701      | 249        | 305        | <b>5</b>   | 530.7 | 38         | 12        |
| COCRY5  | N7Q       | Active   | 1511    | 215      | 3          | 3          | <b>6</b>   | 563.1 | 40         | 10        |
|         | N7B       | Active   | 2084    | 250      | 6          | 8          | <b>7</b>   | 551.7 | 41         | 9         |
|         | 03P       | Active   | 1517    | 313      | 7          | 9          | <b>8</b>   | 548.0 | 38         | 9         |
|         | W32       | Active   | 460     | 247      | 13         | 14         | <b>9</b>   | 586.0 | 39         | 7         |

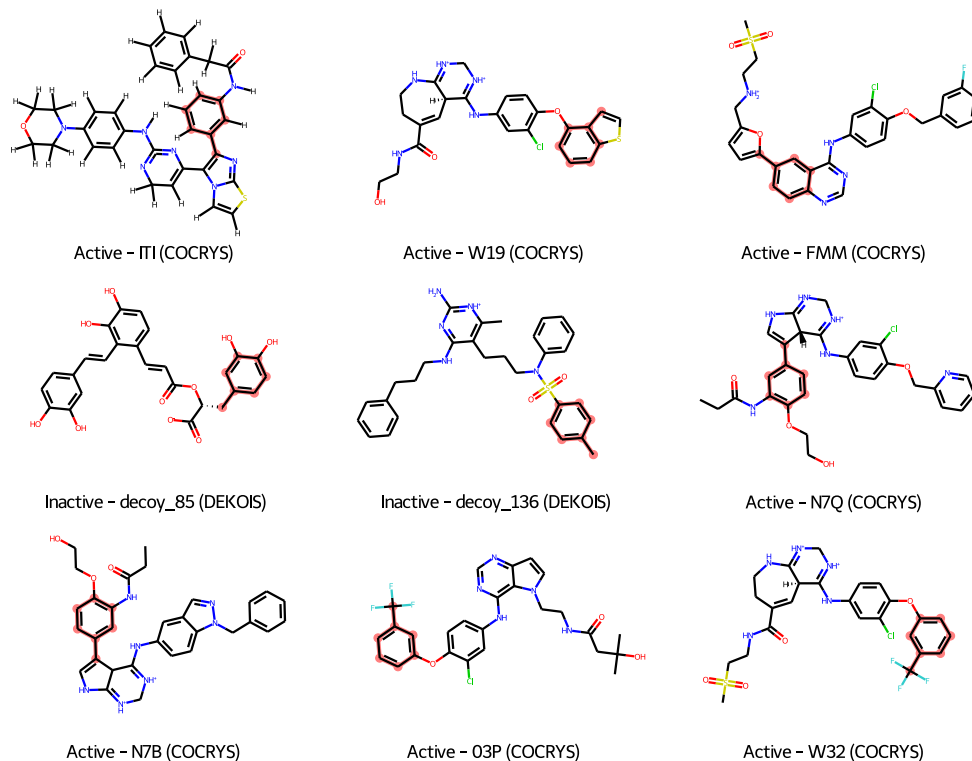

Figure S20: EGFR protein. Structures of the top 9 molecules as judged by the csMIN classifier after the 30×4cv implementation. The maximum common substructure is highlighted in red (*rdkit: completeRingsOnly = False*). An extended version can be consulted in the GitHub repository.

Table S12: HSP90 protein. Top 9 molecules as judged by the GBT classifier after the 30×4cv implementation. Ranks according to the other methods are also shown.

| Library | Lig. Name | Activity | rank LR | rank GBT   | rank csAVG | rank csGEO | rank csMIN | MW    | Num. atoms | Num. rots |
|---------|-----------|----------|---------|------------|------------|------------|------------|-------|------------|-----------|
| DUD     | ligand_33 | Active   | 2       | <b>1</b>   | 604        | 552        | 1063       | 432.3 | 27         | 5         |
|         | ligand_35 | Active   | 5       | <b>2.5</b> | 423        | 363        | 1147       | 387.8 | 27         | 5         |
|         | ligand_31 | Active   | 12      | <b>2.5</b> | 598        | 554        | 1127       | 373.8 | 26         | 4         |
| COCRY5  | 9ZC       | Active   | 29      | <b>4</b>   | 259        | 217        | 531        | 382.4 | 28         | 4         |
| DUD     | ligand_37 | Active   | 11      | <b>5</b>   | 366        | 310        | 1227       | 401.9 | 28         | 5         |
|         | ligand_25 | Active   | 23      | <b>6</b>   | 762        | 716        | 600        | 330.8 | 23         | 3         |
| COCRY5  | 2GG       | Active   | 24      | <b>7</b>   | 422        | 385        | 832        | 388.8 | 27         | 5         |
| DUD     | ligand_5  | Active   | 39      | <b>8</b>   | 382        | 345        | 537        | 352.4 | 26         | 3         |
| COCRY5  | 06T       | Active   | 550     | <b>9</b>   | 1567       | 1946       | 146        | 494.7 | 36         | 2         |

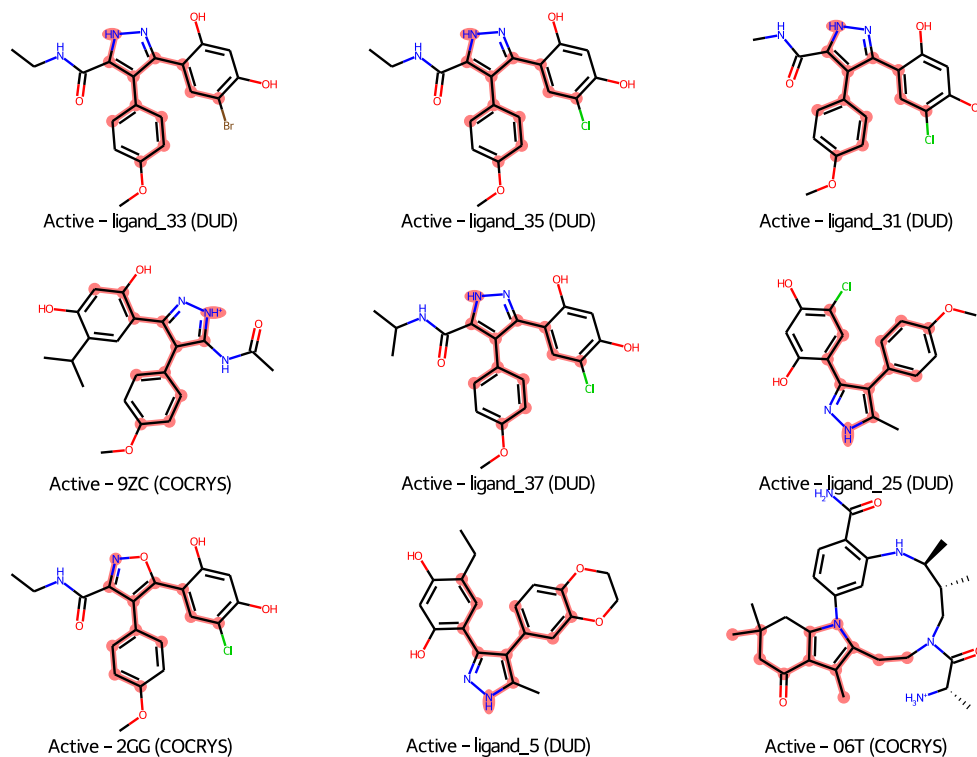

Figure S21: HSP90 protein. Structures of the top 9 molecules as judged by the GBT classifier after the 30×4cv implementation. The maximum common substructure is highlighted in red (*rdkit:completeRingsOnly* = False). An extended version can be consulted in the GitHub repository.

Table S13: HSP90 protein. Top 9 molecules as judged by the csMIN classifier after the 30×4cv implementation. Ranks according to the other methods are also shown.

| Library | Lig. Name  | Activity | rank LR | rank GBT | rank csAVG | rank csGEO | rank csMIN | MW    | Num. atoms | Num. rots |
|---------|------------|----------|---------|----------|------------|------------|------------|-------|------------|-----------|
| COCRY5  | YKE        | Active   | 66      | 49       | 1          | 1          | <b>1</b>   | 453.5 | 35         | 3         |
|         | 73Y        | Active   | 214     | 56       | 6          | 7          | <b>2</b>   | 532.4 | 36         | 3         |
|         | 72K        | Active   | 1686    | 181      | 75         | 103        | <b>3</b>   | 491.6 | 37         | 5         |
|         | 73S        | Active   | 7       | 32       | 3          | 4          | <b>4</b>   | 453.9 | 33         | 3         |
|         | YKJ        | Active   | 315     | 40       | 13         | 51         | <b>5</b>   | 418.5 | 32         | 3         |
|         | YKI        | Active   | 9       | 26       | 7          | 13         | <b>6</b>   | 443.5 | 34         | 3         |
|         | YKC        | Active   | 1440    | 205      | 74         | 141        | <b>7</b>   | 403.4 | 31         | 3         |
|         | YKB        | Active   | 112     | 33       | 22         | 68         | <b>8</b>   | 397.4 | 30         | 5         |
| DEKOIS  | decoy_1044 | Inactive | 2233    | 466      | 101        | 143        | <b>9</b>   | 496.6 | 37         | 9         |

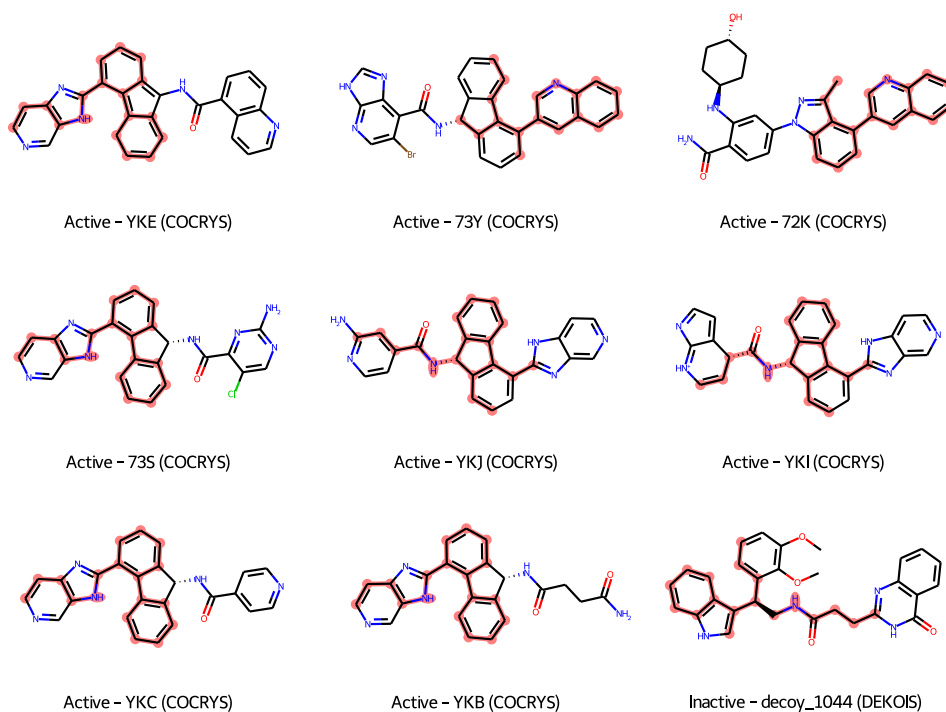

Figure S22: HSP90 protein. Structures of the top 9 molecules as judged by the csMIN classifier after the 30×4cv implementation. The maximum common substructure is highlighted in red (*rdkit*: completeRingsOnly = False). An extended version can be consulted in the GitHub repository.

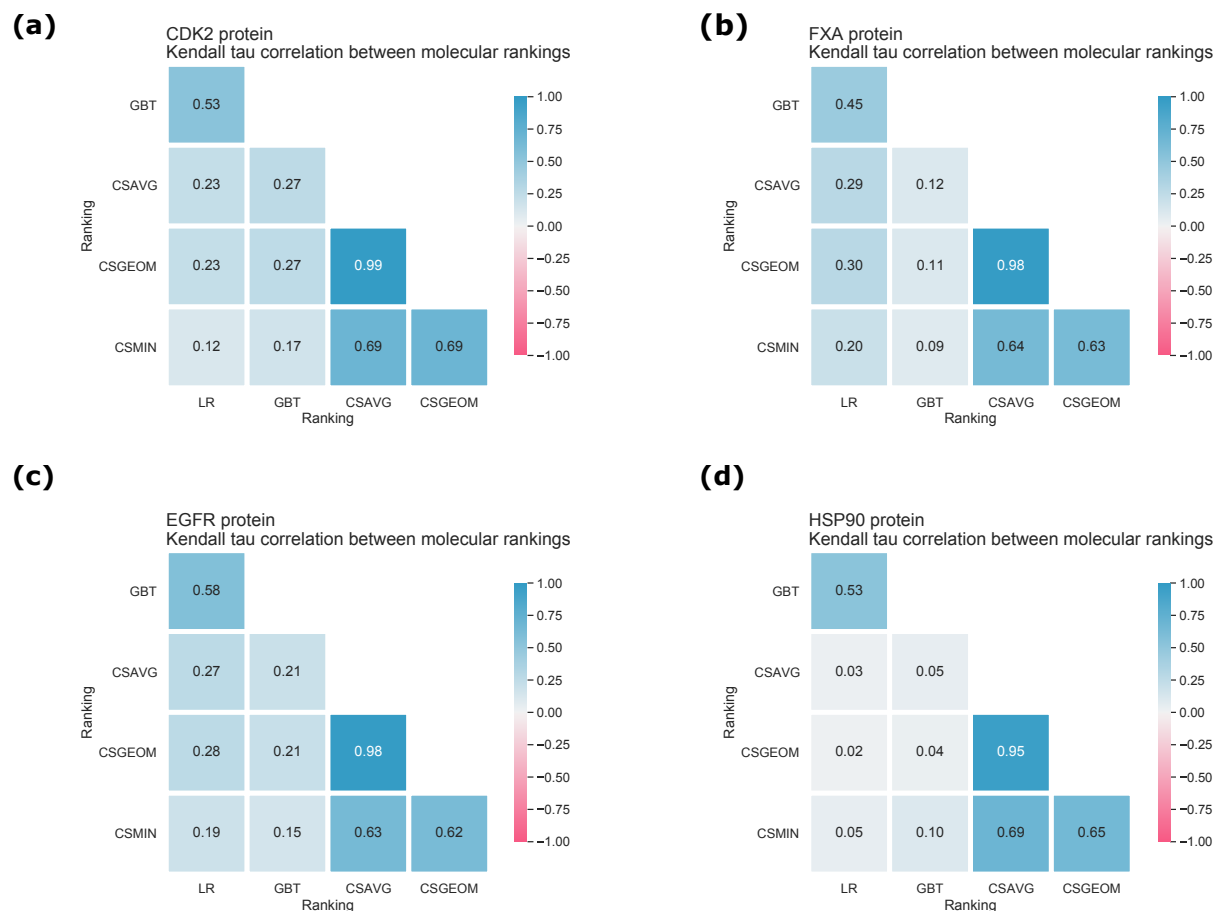

Figure S23: Pairwise Kendall's tau correlations between molecular rankings obtained by the machine learning classifiers and the consensus strategies. (a) CDK2 protein results. (b) FXa protein results. (c) EGFR protein results. (d) HSP90 protein results. The virtual screening methods compared are: *LR*: Logistic Regression; *GBT*: Gradient Boosting Trees; *csAVG*: average; *csGEO*: geometric mean; *csMIN*: minimum.



## References

- (1) Pedregosa, F. et al. Scikit-learn: Machine learning in Python. *Journal of Machine Learning Research* **2011**,
- (2) Chen, T.; Guestrin, C. XGBoost: A scalable tree boosting system. Proceedings of the ACM SIGKDD International Conference on Knowledge Discovery and Data Mining. 2016.
- (3) Shapiro, S. S.; Wilk, M. B. An analysis of variance test for normality (complete samples). *Biometrika* **1965**, *52*, 591–611.
- (4) Mauchly, J. W. Significance Test for Sphericity of a Normal  $n$ -Variate Distribution. *The Annals of Mathematical Statistics* **1940**, *11*, 204–209.
- (5) Kruskal, W. H.; Wallins, W. W. Use of Ranks in One-Criterion Variance Analysis. *Journal of the American Statistical Association* **1952**, *47*, 583–621.
- (6) Dunn, O. Multiple comparisons using rank sums. *Technometrics* **1964**, *6*, 241–256.
- (7) Pisani, P.; Caporuscio, F.; Carlino, L.; Rastelli, G. Molecular dynamics simulations and classical multidimensional scaling unveil new metastable states in the conformational landscape of CDK2. *PLoS ONE* **2016**, *11*, 1–22.
- (8) Wagner, J. R.; Sørensen, J.; Hensley, N.; Wong, C.; Zhu, C.; Perison, T.; Amaro, R. E. POVME 3.0: Software for Mapping Binding Pocket Flexibility. *Journal of Chemical Theory and Computation* **2017**, *13*, 4584–4592.
